1 **Exosome-mediated crosstalk stimulated by liver fluke granulin promotes a**  
2 **microenvironment conducive to cholangiocarcinoma**

3

4 **Patpicha Arunsan<sup>1,2,\*</sup>, Apisit Chaidee<sup>1,2,\*</sup>, Christina J. Cochran<sup>1</sup>, Victoria H. Mann<sup>1</sup>,**  
5 **Toshihiko Tanno<sup>3</sup>, Chutima Kumkhaek<sup>4</sup>, Michael J. Smout<sup>5</sup>, Shannon E. Karinshak<sup>1</sup>,**  
6 **Rutchanee Rodpai<sup>1,2</sup>, Javier Sotillo<sup>5,6</sup>, Alex Loukas<sup>5</sup>, Thewarach Laha<sup>2</sup>, Paul J. Brindley<sup>1,\*</sup>,**  
7 **Wannaporn Ittiprasert<sup>1\*</sup>**

8

9 <sup>1</sup> Department of Microbiology, Immunology & Tropical Medicine, & Research Center for  
10 Neglected Diseases of Poverty, School of Medicine & Health Sciences, George Washington  
11 University, Washington, D.C. 20037, USA

12 <sup>2</sup> Department of Parasitology, Faculty of Medicine, Khon Kaen University, Khon Kaen, 40002,  
13 Thailand

14 <sup>3</sup> Department of Surgery and the Institute of Human Virology, University of Maryland,  
15 Baltimore, MD 21201, USA

16 <sup>4</sup> Cellular and Molecular Therapeutics Laboratory, National Heart, Lungs and Blood Institute,  
17 National Institutes of Health, Bethesda, MD 20814 USA

18 <sup>5</sup> Centre for Molecular Therapeutics, Australian Institute of Tropical Health and Medicine, James  
19 Cook University, Cairns, QLD 4878, Australia

20

21 <sup>6</sup> Laboratorio de Helmintos, Laboratorio de Referencia e Investigación en Enfermedades  
22 Parasitarias, Centro Nacional de Microbiología, Madrid, España

23

24 \*equal contribution

25

26 Correspondence: Wannaporn Ittiprasert, [wannaporni@gwu.edu](mailto:wannaporni@gwu.edu); Paul J. Brindley,  
27 [pbrindley@gwu.edu](mailto:pbrindley@gwu.edu)

28

29

30

31

32

33

34

35

36

37

38 **Abstract**

39 Crosstalk between malignant and neighboring cells contributes to tumor growth. In East Asia,  
40 infection with fish-borne liver flukes is a major risk factor for cholangiocarcinoma (CCA). The  
41 liver fluke *Opisthorchis viverrini* secretes a growth factor, termed liver fluke granulin (*Ov*-GRN-  
42 1), a homologue of the human progranulin (huPGRN). Secreted *Ov*-GRN-1 contributes  
43 significantly to biliary tract fibrosis and morbidity during infection. Here, exosome-mediated  
44 transfer of mRNAs from a human cholangiocyte cell line following exposure to *Ov*-GRN-1 to  
45 naïve recipient cells was investigated. In addition, aiming to minimize the effects of endogenous  
46 human GRN, the gene encoding human granulin was inactivated in H69 line cholangiocytes by  
47 genome editing, and several huPGRN-depleted cell lines, termed  $\Delta$ huPGRN-H69 cells, were  
48 established. These mutant H69 cell lines, termed  $\Delta$ huPGRN-H69, exhibited >80% reduction in  
49 huPGRN transcription and protein expression, both within cells and within secreted exosomes.  
50 Profiles of exosomal RNAs (exRNA) from  $\Delta$ huPGRN-H69 cells for CCA-associated  
51 characteristics revealed a paucity of transcripts for estrogen- and Wnt-signaling pathways,  
52 peptidase inhibitors and tyrosine phosphatase related to cellular processes including oncogenic  
53 transformation. Exposure to *Ov*-GRN-1 induced CCA-specific mRNAs including mRNAs  
54 encoding MAPK/AKT pathway members. By comparison, estrogen, Wnt/PI3K and TGF  
55 signaling and other CCA pathway mRNAs were upregulated in wild type H69 exposed to *Ov*-  
56 GRN-1. Of these CCA-associated exRNAs, MAPK13 and SOX2 modified the  
57 microenvironment in naïve recipient cells co-cultured with exosomes from  $\Delta$ huPGRN-H69  
58 exposed to *Ov*-GRN-1, and induced transcription of MAPK13 and SOX2 in naïve H69 cells.  
59 Crosstalk in response to liver fluke granulin promoted a CCA-specific program through RTK  
60 signaling via MAPK and Wnt/ $\beta$ -catenin which, in turn, established a CCA-conducive milieu.

61 **Keywords**

62 Granulin, *Opisthorchis viverrini*, cholangiocarcinoma, exosomal RNA, cancerous  
63 microenvironment, CCA mRNA intercellular transfer, crosstalk

64  
65  
66  
67  
68  
69  
70  
71  
72  
73  
74  
75  
76

## 77 **Introduction**

78 Cholangiocarcinoma (CCA) represents a diverse group of malignancies arising from the biliary  
79 epithelium. CCA is derived from cholangiocytes, which form the epithelial lining of both  
80 intrahepatic and extrahepatic bile ducts, except for those of the gallbladder. Many CCA are  
81 adenocarcinomas [1, 2]. The causative agent for many cancers remains obscure including non-  
82 liver fluke infection-associated CCA. By contrast, the principal risk factor in liver fluke-endemic  
83 regions is well established: infection with *O. viverrini* and related parasites [3-6]. Infection with  
84 *O. viverrini* is the principal risk factor for CCA in the Lower Mekong River Basin countries  
85 including Thailand, Lao PDR, Vietnam and Cambodia [5, 6]. It has been estimated that 10% of  
86 people chronically infected with liver flukes will develop CCA [7]. In regions endemic for  
87 opisthorchiasis, the prevalence of CCA can exceed 80 cases per 100,000 residents [8].

88  
89 Helminth parasites communicate and interact at the host-parasite interface [9] Communication is  
90 facilitated by metabolic products secreted from the tegument and excretory tissues, including via  
91 exosomes [10]. The liver fluke *O. viverrini* releases numerous proteins and other metabolites  
92 [11], which influence host cells including cholangiocytes in diverse ways [12-15]. Whereas the  
93 full complement of metabolites released by this parasite remain generally to be investigated for  
94 roles of communication and disease, a secreted protein termed liver fluke granulin has been the  
95 focus of increasing investigation. *Ov*-GRN-1 is of human granulin, and like the human  
96 homologue stimulates cell proliferation, wound healing and has been suggested to contribute to  
97 the pathogenesis of opisthorchiasis [16-20].

98 Recently, we exploited this link to explore the role of the secreted growth factor termed liver  
99 fluke granulin (*Ov*-GRN-1) in pre-malignant lesions by undertaking programmed CRISPR/Cas9  
100 knockout of the *Ov*-GRN-1 gene from the liver fluke genome. Deep sequencing of amplicon  
101 libraries from genomic DNA of gene-edited parasites revealed Cas9-catalyzed mutations within  
102 *Ov*-GRN-1. Gene editing resulted in rapid depletion of *Ov*-GRN-1 encoding transcripts and the  
103 *Ov*-GRN-1 protein. The infection resulted in markedly reduced disease even though gene-edited  
104 parasites colonized the biliary tract of hamsters and developed into adult flukes. These findings  
105 confirmed a role for *Ov*-GRN-1 in virulence of the hepatobiliary morbidity characteristic of  
106 opisthorchiasis [21]. In the present report, exosome-mediated transfer of mRNAs to naïve  
107 recipient H69 cholangiocytes from cholangiocytes following exposure to *Ov*-GRN-1 was  
108 investigated, including to recipient cells where the progranulin gene had been inactivated by  
109 CRISPR/Cas9 knockout. Exosome-mediated crosstalk in response to liver fluke granulin  
110 appeared to promote CCA-specific programs including via MAPK signaling that, in turn,  
111 established a microenvironment supportive of carcinogenesis.

## 112 **Results**

### 113 **Programmed gene edited cell lines, $\Delta$ huPGRN-H69**

114 The CRISPR/Cas9 system was used to edit exon 2 of the human progranulin gene locus, a region  
115 encoding the N-terminus and part of the granulin/epithelin module (GEM) of huPGRN. H69  
116 cells were transduced with pLV-huPGRNX2 virions at  $> 5 \times 10^5$  infective unit per ml (IFU) (Fig.  
117 1A, B). One day later, transduced cells were transferred to culture medium supplemented with  
118 puromycin at increasing concentrations from 50 to 500 ng/ml, with the goal of enrichment of  
119 cells positive for expression of the puromycin resistance marker (puro<sup>R</sup>)[22]. The daughter cell  
120 lines were termed  $\Delta$ huPGRN-H69. The three independent amplicon NGS libraries were

121 constructed (three biological replicates from cell culture passages number 20 in each case) were  
122 used to investigate the efficacy of on-target mutation knockout at huPGRN exon 2 in the  
123  $\Delta$ huPGRN-H69 daughter lines.

124 Based on Ion Torrent NGS deep sequencing of the three amplicon libraries, 139,362, 107,683  
125 and 179, 122 sequence reads were obtained and analyzed using the CRISPResso pipeline for  
126 prediction of on-target programmed gene cleavage and subsequent non-homologous end joining  
127 (NHEJ) mediated-repair, and insertion-deletion (INDEL) characteristics [23] compared with the  
128 wild type gene. Analysis of these sequenced reads using CRISPResso revealed the mutations in  
129 32.3, 41.9 and 44.3% of the alleles from each of libraries, respectively. Similar INDEL profiles  
130 were seen in each library, with 6 bp and 2 bp deletions representing frequently observed deletion  
131 mutation alleles (Fig 1E) along with >0.08% 1 bp insertions and up to 10 bp deletions at the site  
132 of the expected Cas9-catalyzed double stranded chromosomal break (Fig 1C, D). These findings  
133 resembled earlier findings which had revealed preferred mutation patterns resulting from the  
134 chromosomal repair of CRISPR/Cas9 double stranded breaks by NHEJ in mammalian cells [24].

135 The surviving cells from three biological replicates were grown under puromycin selection. At  
136 that point, huPGRN transcript levels were reduced to only ~30% (24.83-34.56%) of levels of  
137 WT H69 cells (Fig. 2A). The INDELs on exon 2 of huPGRN DNA also affected the PGRN  
138 protein levels, which were only  $21.45 \pm 2.34$  % of the level of the WT progenitors H69 cells  
139 (normalized against the GAPDH reference) (Fig. 2B). These were significantly significant  
140 reductions (unpaired *t*-tests;  $P < 0.0001$  in both).

#### 141 **Recovery of cell proliferation in huPGRN knock out cells following exposure to rOv-GRN-1**

142 To assess loss of cellular proliferation in H69 cells following mutation of the huPGRN gene by  
143 programmed CRISPR/Cas9 knockout, along with assessment of the mitogenic activity of rOv-  
144 GRN-1, we monitored cell proliferation for more than 96 hours using the xCELLigence RTCA  
145 system [25]. This is a label-free cell-based assay system, which uses culture plates containing  
146 gold microelectrodes to non-invasively monitor the viability of cultured cells. The electrical  
147 impedance of the cell population in each well is measured by electrodes to provide quantitative  
148 real time information about the cell growth. During the assay, the impedance value of each well  
149 was automatically monitored. The rate of cell growth was determined by calculating the slope of  
150 the line between two given time points. Negative slope revealed that the cell index decreases  
151 with time and cells detach from the wells. Figure 2D presents the mean slope of three  
152 experiments performed in triplicate calculated at nine time points between 12-108 hours, for each  
153 of the wild type H69 parental cells and the  $\Delta$ huPGRN-H69 daughter cell lines. The cells were  
154 exposed to liver fluke granulin at 100 nM.

155 From 12 to 84 hours, the  $\Delta$ huPGRN-H69 cells showed significantly less proliferation (CI 75-  
156 95%; blue) as compared to the H69 cells (gray line, used for normalization as 100% CI).

157 Following pulsing with rOv-GRN-1, cell proliferation rates of  $\Delta$ huPGRN-H69 cells (red) were  
158 similar to those for H69 (black) over the first 24 hours. Recombinant Ov-GRN-1 activated cell  
159 proliferation in both H69 and  $\Delta$ huPGRN-H69, leading to higher cell indexes (CI), i.e. more  
160 cellular proliferation than control cells not exposed to rOv-GRN-1. This trend was evident for  
161 both the H69 and mutant H69 cells during the entire array, >96 hours. Even though H69 cells  
162 exposed to rOv-GRN-1 proliferated at higher levels than the gene edited cells during the 12-84 h,  
163 their CI values were similar by 96 hours (CI ~100%). Intriguingly, the  $\Delta$ huPGRN-H69 cells

164 exposed to rOv-GRN-1 exhibited even higher levels of proliferation (>200% CI) and survived  
165 until the termination of the assay at day 5 (Figure 2D).

### 166 **Characterization of exosomes from H69 cholangiocytes**

167 Exosome particles from culture supernatants of H69 cells were precipitated using an exosome  
168 isolation reagent (ThermoFisher). Subsequently, the exosomes were examined for expression of  
169 by western blot (WB) analysis targeting the hallmark exosome surface marker CD9 and CD81,  
170 using antibodies specific for CD9 and CD81. Signals at the expected sizes of 24 kDa and 26  
171 kDa, respectively, confirmed the presence of the target markers (Fig. 3A). In addition,  
172 biochemical characterization using the Exosome Antibody Array platform revealed the presence  
173 of exosomal marker proteins: flotillin-1 (FLOT-1), intercellular adhesion molecule 1 (ICAM),  
174 ALG-2-interacting protein 1 (ALIX), CD81, epithelial cell adhesion molecule (EpCAM),  
175 Annexin V (ANXAS) and tumor susceptibility gene 101 (TSG101). Together, these findings  
176 confirmed the identity of the supernatant particles as exosomes released from the H69 cells. In  
177 addition, these purified exosomes were negative for cis-Golgi matrix protein (GM130) on  
178 Exosome Antibody Array, indicating the absence of contaminating cellular debris (Fig. 3B).  
179 Confocal microscopy revealed exosome particles surrounding DAPI-stained nuclei of the H69  
180 cells following probing with anti-CD81 labeled with fluorophore 488 (green). The particle size  
181 distribution ranged from 55-80 nm (Fig. 3C).

### 182 **CRISPR/Cas9 knockout of huPGRN negatively impacted exosome-located granulin**

183 We validated the expression of huPGRN exosomal mRNA from three biological replicates of  
184 puromycin resistant H69 cells at passage number 20 in each case. There was only 7.2% (4.65-  
185 9.83%) differential GRN transcript from exRNA of  $\Delta$ huPGRN-H69 (Fig. 3D) compared with  
186 H69 derived-exosomes, after normalizing with GAPDH. Means were compared using unpaired  
187 *t*-test ( $P < 0.0001$ ) by Prism software.

188  
189 Moreover, the programmed mutation induced INDELs at exon 2 of huPGRN DNA (Fig. 1) also  
190 negatively impacted translation of the PGRN within the protein complement of the exosomes.  
191 There was  $10.46 \pm 1.96\%$  proteomic huPGRN detected from the  $\Delta$ huPGRN-H69 cell compared  
192 with H69 cells after normalization with GAPDH protein from cell lysate and exosome protein,  
193 respectively. The huPGRN protein expression revealed by WB using anti-GRN antibody  
194 (Abcam, Cambridge, MA, catalog no. ab 108608) (product size, 64 kDa) compared with anti-  
195 GAPDH antibody (Sigma-Aldrich, catalog no. G9545). The GAPDH protein levels from both  
196 cell lysate and exosomal protein showed redundant expression (product size, 36 kDa). The low  
197 The levels of huPGRN protein from cell lysate and secreted exosomes were significantly lower  
198 than with H69 cells (unpaired Student's *t*-test,  $P < 0.0001$ ) (Fig. 3E).

### 199 **CCA-related mRNA profiles from exosomal RNAs of H69 versus $\Delta$ huPGRN-H69 cells**

200 The 88 gene target Cholangiocarcinoma (CCA) Prime PCR array (Bio-Rad) was used. The  
201 cDNA of pooled exRNAs from three biological replicates (RNase treated) was synthesized using  
202 iScript Advanced cDNA Synthesis Kit (Bio-Rad). The cDNA was directly applied into CCA  
203 mRNA coated-well of 96-well plate (one gene per well), the SYBR green fluorescent PCR as  
204 manufacturer's instruction was run in a real time thermal cycler (iQ5, Bio-Rad). The levels of  
205 each transcript were calculated by the Prime PCR Bio-Rad software compared with control  
206 cDNA (exosome derived-H69), as described. Each cDNA sample was run in triplicate (three  
207 array per samples).



208 The  $\Delta$ huPGRN-H69 exRNAs did not include transcripts for dihydropyrimidine dehydrogenase  
209 (DPYD), estrogen receptor 1 and 2 (ESR1 and ESR2, respectively), lysine [K]-specific  
210 demethylase 3A (KDM3A), lymphoid enhancer-binding factor-1 (LEF1), protein tyrosine  
211 phosphatase, non-receptor type 13 (PRIN13 which is Fas-associated phosphatase), serpin  
212 peptidase inhibitor, clade A, member 3 (SERRINA3), serpin peptidase inhibitor, clade E,  
213 member 2 (SERRPINE2) and SRY-related HMG-box 11 (SOX11) (Fig. 4), while these mRNA  
214 read as positive in the exRNA from H69 cells. Using the PrimePCR<sup>TM</sup> Assay Validation report  
215 (Bio-Rad) for these genes, DPYD, ESR1, ESR2, KDM3A and SOX11 genes are known to be  
216 involved in pyrimidine catabolic enzymes, hormone binding, DNA binding and activation of  
217 transcriptions and activate transcription factor, respectively. LEF1 encodes a transcription  
218 factor that is involved in the Wnt signaling pathway. PTPN13 is a member of protein tyrosine  
219 phosphatase family which regulates a variety of cellular processes including oncogenic  
220 transformation [26]. The PRINA3 and SERPINA3 encode protease and peptidase inhibitors. The  
221 exogenous granulin, rOv-GRN-1 treatment recovered the expression of LEF1, SERRPINE2 and  
222 SOX11 in secreted exosomes (Fig. 4) with significant transcript induction in comparison with  
223 exRNA from H69 cells.

#### 224 **CCA pathways potentially impacted by liver fluke granulin-induced activation**

225 There were seven exRNAs; annexin A3 (ANXA3), heparinase (HPSE), S100 calcium binding  
226 protein P (SP100P), carbonic anhydrase II (CA2), protein kinase C, theta (PRKC $\theta$ ), thymidine  
227 phosphorylase (TYMP), mitogen-activated protein kinase 13 (MAPK13) that were not detected  
228 in exRNA-H69 (control). However, after rOv-GRN-1 treatment these genes were read as strongly  
229 positive SYBR green signals in the PrimePCR array (Bio-Rad) after normalization with  
230 reference genes (Fig. 4). The genes in family of calcium-dependent phospholipid-binding protein  
231 associated with cellular growth and signal transduction include ANXA3, CA2 and SP100P. The  
232 signal pathway(s) for extracellular matrix remodeling and angiogenesis were revealed from  
233 HPSE (enzyme that cleaves heparan sulfate proteoglycans to permit cell movement through  
234 remodeling of the extracellular matrix) and TYMP (angiogenic factor) exRNA expression. Two  
235 exosome transcripts, PRCK $\theta$  and MAPK13 involved in the MAPK signaling pathway were  
236 detected in  $\Delta$ huPGRN-H69 cell after rOv-GRN-1 activation. They were absent from exRNAs  
237 derived from H69 or  $\Delta$ huPGRN-H69 cells. Accordingly, our findings accord with the hypothesis  
238 that MAPK is a major pathway involved in cholangiocarcinogenesis associated with liver fluke  
239 infection [20, 27].

240 Moreover, six transcripts showed significant induction (4-6 differential transcript changes) in  
241 exosomes derived  $\Delta$ huPGRN-H69 cells, but change in exosomes derived H69 cell after rOv-  
242 GRN-1 treatment was not apparent. The ATP-binding cassette, sub-family C, member 1 and 4  
243 (ABCC1 and ABCC4, respectively), calcium/calmodulin-dependent protein kinase II gamma  
244 (CAMK2G), interleukin-17 receptor A (IL17RA), lymphoid enhancer-binding factor 1 (LEF1)  
245 and 8-oxoguanine DNA glycosylase (OGG1) exhibited significantly elevated transcript levels,  
246 >2 fold greater than levels in H69 cells.

#### 247 **Potential of endogenous granulin support mitogen *O. viverrini* granulin to induce the CCA** 248 **tumorigenesis in cholangiocyte**

249 To investigate the endogenous growth factor huPGRN that is potentially involved together with  
250 exogenous GRN which could mimic *in vivo* evidence of *Ov* infection, we also activated H69  
251 with 100 nM rOv-GRN-1 for overnight in medium containing exosome depleted serum. The

252 exosome RNA was performed for exRNA transcript expression as mentioned above. Our results  
253 revealed 39 from 88 CCA related-gene profile including DPYD, ESR1, ESR2, LEF1, and  
254 SERPINA3 shown significant induction ( $\geq 2$  folds change) comparing with exRNAs from H69  
255 cells. Ten exRNAs including KDM3A, PTPN13, SERPINE2, and SOX11 (absent in  $\Delta$ huPGRN-  
256 H69) were expressed from both H69 and  $\Delta$ huPGRN-H69 cells after rOv-GRN-1 activation.  
257 Another six genes are ERBB2, FBXW7, RRM1, SCD, SOX2 and ZNF827 encode epidermal  
258 growth factor, F-box protein, ribonucleotide reductase M1, stearoyl-CoA desaturase, and SOX  
259 family transcription factor and zinc finger protein 827. Most of these genes are involved in  
260 cancerous mechanism and malignancies as shown in Figure 4.

261 Twenty-nine CCA related-genes were increased from exosomes derived, rOv-GRN--treated-H69  
262 cells. These mRNA transcripts did not observe or non-significant induction in exRNAs from  
263 rOv-GRN-1 treated- $\Delta$ huPGRN-H69 cells. The function of these genes was as follows: 1) *cell*  
264 *structure*, including tubulin beta 2a (TUBB2A), mitochondrial ribosomal protein S6 (MRPS6),  
265 haptoglobin (HP), keratin19 (KRT19), actin 1 (ACTA1), breast cancer 1 (BRCA1) and chloride  
266 intercellular channel 5 (CLIC5); 2) *enzymes*, peptidase inhibitor (SERPINA3), phospholipase  
267 A2 (PLA2G2A), ornithine decarboxylase 1 (ODC1), natriuretic peptide B (NPPB) and o-6-  
268 methylguanine-DNA methyltransferase (MGMT); 3) *transcription factor/signal transduction*,  
269 neuronal PAS domain protein 2 (NPAS2), msh home box1 (MSX1) and homeboxA9 (HOXA9)  
270 4) *growth factor*, insulin-like growth factor2 mRNA binding protein 3 (IGF2BP3), IGF2,  
271 epidermal growth factor receptor (EGFR); 5) *Estrogen pathway signaling*, ESR1 and ESR2; 6)  
272 *Wnt signaling*, homolog 7 (FZD7); 7) *cell signaling/migration*, neuron navigator 2 (NAV2),  
273 chemokine (C-X-C-motif) receptor 4 (CXCR4) and cannabinoid receptor (CNR1); 8) *TGF-beta*  
274 *signaling*, SMAD family member 4 (SMAD4); and 9) *unknown function*, metadherin (MTDH).

### 275 **Cholangiocyte cell line endocytose exosome particles via clathrin endocytosis mechanism**

276 Extracellular exosomes have shown evidence that they can enter cells and deliver their cargo to  
277 the recipient cells [28]. To confirm the event of exosome internalization by recipient cells, we  
278 labeled the exosomes with PKH-26 red fluorescent cell linker kit (Sigma-Aldrich) before direct  
279 co-culture with H69 cells for 90 min. The endocytosis inhibitor reagent, Pitstop **was also**  
280 **included to block clathrin endocytosis mechanism of H69 cells. The cells were pre-**  
281 **incubated with** Pitstop for 15 min before adding PKH-26 labeled-exosomes. From our results,  
282 we observed that H69 start endocytosed the exosome particles early as 30 min, and success to  
283 endocytose ~90% of cell population within 90 min (Fig. 5). Far fewer cells endocytosed  
284 exosomes after exposure to Pitstop2.

### 285 **Horizontal intercellular transfer exosomal RNAs from rOv-GRN-1 activated- $\Delta$ huPGRN- 286 H69 donor cells to naïve recipient cells**

287 To study the horizontal transfer of mRNA from donor cells, rOv-GRN-1 treated- $\Delta$ huPGRN-H69  
288 cell via exosomes to the naïve recipient cells either H69 or - $\Delta$ huPGRN-H69 cells, we treated  
289 recipient cells with freshly prepared-deriving from rOv-GRN-1 treated- $\Delta$ huPGRN-H69 cell for  
290 18 h before co-culture with adherent recipient cells for 3, 6 and 24 hours. The genes of interest  
291 that present/induce after rOv-GRN-1 activation including MAPK13, SOX11, and SOX2 were  
292 investigated for cellular mRNA expression in recipient cells comparing with control group. The  
293 control group was untreated with exosomes derived- $\Delta$ huPGRN-H69 cell.

294 From our experiment, we demonstrated that the exosomes carrying CCA related-mRNA from  
295 rOv-GRN-1 treated- $\Delta$ huPGRN-H69 cell were functional and be able to stimulate the naïve cells  
296 for cellular transcript of the particular messages. After exosome co-culture, we observed the  
297 MAPK13 transcript induction for 3-6 hours from both naïve H69 cell with 300-512% different  
298 fold changes and  $\Delta$ huPGRN-H69 cells with 130 to 256% different fold change compared with  
299 the respective controls (indicated as 100% expression) (Fig. 5F). The MAPK13 transcript  
300 showed a high peak expression at 6 hours, after which it fell during the co-culture. However, at  
301 24 h, the level of the MAPK13 transcript were still statistic significantly higher than the control  
302 group. The H69 cell was stimulated for MAPK13 transcript induction higher than  $\Delta$ huPGRN-  
303 H69 cell (Fig. 5F).

304 Similar findings were seen with the SOX2 transcript pattern for 3-24 hours from the recipient  
305 cell types. At 6 hours, SOX2 from H69 has shown ~1,024 folds change and ~150 folds change at  
306 24 hrs. The SOX2 exRNA stimulated  $\Delta$ huPGRN-H69 cell quicker than in H69 cells showing  
307 more than 2,048 folds different after 3 h exosome co-culture. The SOX2 transcript shown  
308 statistic significantly higher than control cell in all time points (Fig. 5D). On the other hand, the  
309 stimulation of SOX11 transcript in recipient cells was success in only H69 cell after 6 hrs. The  
310 over expression of SOX11 at 6 h post co-culture shown over 10,000 folds changes, and ~5,000  
311 folds changes at 24 hrs. Transcript level changes for SOX11 were not seen in  $\Delta$ huPGRN-H69  
312 cells (Fig. 5E).

### 313 **Discussion**

314 A recent report charted the mutational profiles of ~500 human CCA tumors, including tumors  
315 from liver fluke infection positive- and non-fluke infection-associated cases [27]. Among the  
316 mutational differences between these epidemiologically and geographically distinct forms, the  
317 tumor clusters were distinguished by idiosyncratic patterns of genome-wide DNA  
318 hypermethylation, targeting either promoter CpG islands or promoter CpG shores, as well as  
319 differences in driver genes. Somatic mutations occur frequently in the tumor suppressor  
320 genes *p53* and *smad4* in *O. viverrini*-induced CCA whereas the genes encoding BRCA1  
321 associated protein-1 and isocitrate dehydrogenases 1 and 2 are mutated frequently with CCA in  
322 regions not endemic for opisthorchiasis or clonorchiasis. The differences were consistent with a  
323 model where external carcinogenic agents and early epigenetic deregulation drive the nascent  
324 neoplasia in liver fluke infection positive CCAs whereas, by contrast, pioneering mutations such  
325 as in *BAP1* or *IDH1/2* loci or *FGFR2* gene rearrangements drive cholangiocarcinogenesis in  
326 many non-fluke infection-associated tumors. The investigators posit that, in this model [27],  
327 infection with the liver fluke induces global epigenetic deregulation in the presence of chronic  
328 inflammation, provoked by the mechanical damage inflicted by the feeding and by other  
329 activities of the parasite, including secreted factors such as liver fluke granulin, thioredoxin  
330 peroxidase, extracellular vesicles and others that modulate the host-pathogen interactions [11, 15,  
331 20].

333 Human progranulin is a secreted, cysteine-rich glycoprotein that regulates cell division, survival,  
334 motility and migration. It has roles in development, wound repair, and cancer, and mutations in  
335 the progranulin gene are associated with a spectrum on neurological disorders [29]. In this  
336 present report, we investigated the exosome-mediated cellular crosstalk among cholangiocytes in  
337 response to liver fluke granulin. The human granulin gene (huPGRN) was disabled by  
338 CRISPR/Cas9, with the aim of masking the influence of endogenous granulin on exogenous liver



339 fluke granulin. Exosome-mediated crosstalk in response to liver fluke granulin appears to  
340 promote CCA-specific programs including via MAPK signaling that, in turn, establish a CCA-  
341 conducive microenvironment. *Ov*-GRN-1 is a paralogue of human granulin, and stimulates cell  
342 proliferation, wound healing and has been suggested to contribute to the pathogenesis of  
343 opisthorchiasis [16-20]. We have exploited this link to explore the role of the secreted growth  
344 factor termed liver fluke granulin (*Ov*-GRN-1) in pre-malignant lesions by undertaking  
345 programmed CRISPR/Cas9 knockout of the *Ov*-GRN-1 gene from the genome of *O. viverrini*.  
346 The infection with *Ov*-GRN-1 knockout worms resulted in markedly reduced disease, which  
347 confirmed the key role for this liver fluke granulin in hepatobiliary morbidity during  
348 opisthorchiasis [21].

349 Following the result of cell proliferation, xCELLigence assay in the  $\Delta$ huPGRN-H69 cell group  
350 revealed the cell progression more than the normal cell after r*Ov*-GRN-1 treatment for 24 hours  
351 and H69 cell were dead at 100 hours. We can say, if host cell have a role of endogenous growth  
352 factor gene together exogenous growth factor, *Ov*-GRN-1, may be attenuate the virulence during  
353 *O. viverrini* infection on the long term due to huPGRN and *Ov*-GRN-1 together may be affected  
354 to reduce or disrupt the functions in two growth factors in the normal cell. Examination of the  
355 CCA gene array revealed CCA genes to cooperate with the exosomes after exposure to r*Ov*-  
356 GRN-1, both for H69 and  $\Delta$ huPGRN-H69 cells including highlighting the likely importance of  
357 signaling pathways related to intracellular communication --- after the naïve H69 and  $\Delta$ huPGRN-  
358 H69 cells were activated with exosomes of the mutant huPGRN-H69 cell treated with  
359 recombinant protein of exogenous growth factor, r*Ov*-GRN-1. We can suggest that the  
360 complement of human cholangiocytes can express the IL-6 and IL-8 through the TLR4-NF-kB  
361 and MAPK signaling pathways [30] which the MAPK pathway is the major of  
362 cholangiocarcinogenesis that activated by *Ov*-GRN during *O. viverrini* infection [16, 31]. For the  
363 CCA development **providing indicate** in the oncogenic signaling pathways [32], contribute on  
364 the many steps of carcinogenesis [33-35], including the Wnt/ $\beta$ -catenin signaling stimulated the  
365 pathology associated CCA [36], that the researcher suggested the Wnt/ $\beta$ -catenin signaling  
366 pathway can include in the inflammation that associated CCA and the Wnt/ $\beta$ -catenin pathway  
367 suppression influenced to inhibit CCA cell development [36]. Moreover, the cell apoptosis, cell  
368 growth, cell to cell interaction, and angiogenesis of CCA cells related with RTK signaling  
369 pathway that revealed the multiple kinases containing PI3K/AKT, Wnt/ $\beta$ -catenin, MAPK, and  
370 JAK/STAT signaling pathways [37-39]. And also, the previous study reported the GRN  
371 development effects to the activation of the MAPK signaling pathway [40], was highlighted as  
372 the upregulated gene in the hepatocellular carcinoma (HCC) and the targeted gene of  
373 microRNA-140-3p (miR-140-3p). Which the overexpression of miR-140-3p can disrupt  
374 the stimulation in the MAPK signaling pathway through inhibiting of GRN expression as  
375 resulting to the phosphorylation of ERK, p38, and c-Jun N-terminal kinase (JNK) was  
376 suppressed and effected to inhibit the migration and invasion of the HCC cells [41].

377  
378 The fold change transcription levels of the MAK13 and SOX2 genes was seen to be up-regulated  
379 after the naïve H69 or mutant cells were exposed to, and presumably endocytosed, exRNA shed  
380 from  $\Delta$ huPGRN-H69 cells that had been exposed to r*Ov*-GRN-1. On the other hand, SOX11  
381 was up-regulated only in the WT H69 cells, when compared with the control group. Perturbation  
382 in the MAPK and Wnt signaling pathways that are activated in these cells may reflect the natural  
383 history of development of CCA [36], where SOX2 expression present in the precursor cells and  
384 supports self-renewal of a transformed cell [42-44]. SOX11 can play a role in the tumor cell

385 progression, in maintenance of the protein complex associated with the Wnt and angiogenesis  
386 signaling pathways [45-47].

387  
388 In conclusion, we describe successful gene-editing in H69 cell by using Cas9 complexes with  
389 guide RNA complementary to human granulin by transduction with the lentiviral particles, the  
390 results revealed that gene-editing induced suppression of huPGRN expression in the transfected  
391 cell. In part of the intracellular communication revealed the relevant pathways in the CCA  
392 development that induced from the exogenous *Ov*-GRN-1 protein. Following programmed gene-  
393 editing, the lesion was apparently repaired via the NHEJ on the site of the huPGRN double-  
394 stranded break. The exogenous growth factor *Ov*-GRN-1 induces proliferation of human  
395 cholangiocytes and it also induces the expression of genes that participate in paracrine  
396 communication. It also induced changes reminiscent of those characteristic of malignant  
397 transformation, involving conserved signaling pathways. The findings indicated that  
398 cholangiocarcinogenesis may be *Ov*-GRN-1 acting through the RTK signaling pathway and  
399 interconnection with the MAPK and Wnt/ $\beta$ -catenin pathways.

## 400 **Materials and methods**

### 401 **Cell lines**

402 The human nonmalignant immortalized cholangiocyte cell line (H69) was cultured in H69  
403 complete medium; Ham's F12 nutrient mixture (25  $\mu$ g/ml adenine, 5  $\mu$ g/ml insulin, 1  $\mu$ g/ml  
404 epinephrine, 0.62  $\mu$ g/ml hydrocortisone, 1.36  $\mu$ g/ml T3-T, and 10 ng/ml epidermal growth factor  
405 (EGF), Dulbecco's Modified Eagle Medium [DMEM] (Gibco), DMEM/F-12 (Sigma) media  
406 containing 10% fetal bovine serum (FBS) and 1 $\times$  penicillin/streptomycin (pen/strep), as  
407 described [20, 48, 49]. H69 cells was maintained in humidified incubator with 5% CO<sub>2</sub> at 37°C.  
408 H69 cells were *Mycoplasma* free as established using the Lookout Mycoplasma PCR detection  
409 kit (Sigma-Aldrich) and authenticated using STR profiling by ATCC before the start of this  
410 study (not shown).

### 411 **Granulin knockout lines of H69 cholangiocytes**

412 To mutate and disable the granulin gene to minimize or eliminate endogenous granulin  
413 expression from H69 that would bias the investigation of the effect of liver fluke granulin, we  
414 employed a pre-designed lentiviral CRISPR/Cas9 vector construct 'All in One CRISPR/Cas9  
415 vector system (Sigma) containing guide RNA targeting human granulin, exon 2 which encodes  
416 granulin-epithelin precursor (GEP); 5'- cctgcaatctttaccgtctc of on chromosome 17:  
417 NC\_000017.11 regions 44,345,086-44-353,106 driven by U6 promoter, elongation factor 1a  
418 promoter driving fusion proteins of the puromycin *N*-acetyl transferase from *Streptomyces*  
419 *alboniger* (puromycin resistance marker, Puro<sup>R</sup>) [22], Cas9 endonuclease from *Streptococcus*  
420 *pyogenes*, and green fluorescent protein (GFP), flanking with long tandem repeat (LTRs) of  
421 HIV-1 as integration sites (Fig. 1A). *E. coli* competent cells were transformed with this  
422 construct, termed pLV-huPGRNx2, and maintained in LB broth, 100  $\mu$ g/ml ampicillin.

423 Several granulin gene-mutated H69 cell (termed  $\Delta$ huPGRN-H69) lines were established  
424 following pLV-huPGRNx2 virion-based transduction of the parent H69 cell line. The pLV-  
425 huPGRNx2 virion was produced by a MISSION<sup>TM</sup> lentiviral packaging kit (Sigma-Aldrich) and  
426 human 293T cells as producer cells using the FUGENE HD transfection reagent (Promega), as  
427 described [50]. The pooled culture supernatant containing pseudotyped virions was collected  
428 from 24 to 48 h after transfection of producer 293T cells. The culture supernatant was

429 centrifuged at  $500 \times g$  for 10 min and filtered through a Millipore Steriflip-GP filter 0.45  $\mu\text{m}$  pore  
430 size (Millipore). Virions were concentrated using Lenti-X concentrator (Takara Bio, CA) after  
431 which titer was measured by using Lenti-X-GoStix (Takara Bio, CA). To edit the exon 2 of the  
432 human granulin gene in H69 cells,  $\sim 350,000$  H69 cells were exposed to 500  $\mu\text{l}$  of pLV-  
433 huPGRNx2 virion ( $>10^5$  infectious units IFU/ml) in 2.5 ml complete H69 medium in 6-well  
434 plates. Twenty-four hours later, the medium was replaced with medium supplemented with  
435 puromycin at 300 ng/ml for selection and enrichment of cells carrying the proviral form of the  
436 gene-editing construct. These gene edited cells were maintained in parallel with wild type (WT)  
437 H69 cells for 48 h, by which point all H69 cells had died. Surviving transduced-cells were  
438 cultured in complete H69 medium for 20 passages before genomic DNA extraction and  
439 genotyping. Between 5-10% of cells demonstrated survival and clonal amplification. There were  
440 three independent biological replicates to establish the puromycin-resistant, H69 knock-out cell  
441 line. The various concentrations, 50-400 ng/ml of puromycin have been optimized with H69  
442 cells to induce cell death within 48 hours, before when employed 300 ng/ml puromycin for  
443 subsequent drug selection of the pLV-huPGRNx2 lentiviral virion transduced cells (data not  
444 shown).

#### 445 **Investigation for CRISPR/Cas9 induced mutations in exon 2 of human granulin by Ion** 446 **Torrent Next Generation Sequencing**

447 After pLV-huPGRNx2 transduction and high concentration of puromycin selection (300 ng/ml),  
448 the survival H69 cells were expanded with several cell culture passages. We amplified the  
449 targeted region of exon 2, huPGRN using the NGS primer pair; forward primer 5'-  
450 GACAAATGGCCCACAACACT-3' and reverse primer 5'-  
451 GCATAAATGCAGACCTAAGCCC-3' (Fig 1B) flanking double strand break (DSB). Genomic  
452 DNAs extracted from puromycin resistance-enriched  $\Delta$ huPGRN-H69 cells (pooled cells after  
453 passage 20) using DNazol (Molecular Research Center). The DNA samples were proceeded for  
454 on-target insertion-deletion (indel) investigation by next generation sequencing (NGS), using the  
455 Ion Torrent Personal Genome Machine (ThermoFisher). The sequencing libraries were prepared  
456 from 10 ng DNA using the Ion Torrent Ampliseq kit 2.0-96 LV (ThermoFisher), following the  
457 manufacturer's instructions. The DNA was bar-coded using the Ion Xpress Barcode Adapters kit  
458 and quantified by quantitative PCR using the Ion Library TaqMan Quantitation Kit  
459 (ThermoFisher) after purification of libraries by Agencourt AMPure XP beads (Beckman).  
460 Emulsion PCR was performed using the Ion PGM Hi-Q View OT2 Kit and the Ion OneTouch 2  
461 system (ThermoFisher). Template-positive ion sphere particles (ISPs) were enriched using the  
462 Ion Torrent OneTouchES. Enriched ISPs were loaded on a PGM 314R v2 chip and sequenced  
463 using the Ion PGM Hi-Q View Sequencing Reagents (ThermoFisher). Raw sequencing data were  
464 processed using the Torrent Suite software v5.0 (ThermoFisher), as well as the coverage analysis  
465 and variant caller (VC) v5.0 plugins. Processed reads were aligned to the human reference  
466 genome (hg38) [51]. All identified variants and the depth of coverage were visually confirmed  
467 by the Integrative Genomic viewer (IGV, Broad Institute, MIT, Cambridge, MA). The number  
468 of reads filtered out by post processing was 9.0%. Average read length was 176 bp. The filtered  
469 sequences were converted into fastq format and analyzed for non-homology end joining (NHEJ)  
470 mediated mutations by CRISPResso [23, 52]. Sequence reads were compared to the reference  
471 PCR sequence of the wild type *huPGRN* gene, GenBank accession M75161.1 (Fig. 1C, D, E).

#### 472 **Assessment of cell proliferation**

473 We assessed the proliferation of H69 and  $\Delta$ huPGRN-H69 cells after 100 nM of recombinant *Ov*-  
474 GRN-1 (*rOv*-GRN-1) [16, 20] treatment using impedance-based xCELLigence real time cell  
475 analysis (RTCA) system (ACEA Biosciences, San Diego, CA). The peptide *rOv*-GRN-1 was  
476 concentrated using Centripeg with cut-off 3 kDa (Eppendorf) and resuspended in low salt  
477 solution, Opti-MEM. The absorbance at 205 nm and concentration of *rOv*-GRN-1 was  
478 determined by using a Nanodrop 2000c spectrophotometer (ThermoFisher) [53]. Five thousand  
479 cells/well were seeded in 16 well-E-plates (ACEA) in H69 complete media. The E-plate was  
480 placed on xCELLigence station inside the incubator (37°C, 5% CO<sub>2</sub>) and changes in impedance  
481 reflecting cell adhesion and proliferation record at intervals of 20 min for 24 h. On the following  
482 day, the medium was removed and replaced with H69 complete medium supplemented with *rOv*-  
483 GRN-1 at 100 nM. Cellular proliferation was monitored for 96 hours, with data for the wild type  
484 H69, *rOv*-GRN-treated H69, and  $\Delta$ huPGRN-H69 with and without *rOv*-GRN-1 treatment  
485 displayed as change of impedance (Cell Index) over time, normalized to wild type H69  
486 (reference cell line in this assay) by RTCA Software 1.2 (ACEA) [25].

#### 487 **Isolation and characterization of exosomes**

488 The WT-H69 or  $\Delta$ huPGRN-H69 cells were treated with 100 nM *rOv*-GRN-1 in H69 complete  
489 media with 10% exosome depleted-FBS. Forty-eight hours later, were harvested the supernatant  
490 from cell culture of H69 with or without, and  $\Delta$ huPGRN-H69 with or without liver fluke  
491 granulin. The supernatants were collected at 48 h following addition of *rOv*-GRN-1, then  
492 centrifuged at 2,000  $\times g$  for 15 minutes to remove cells and cellular debris. The supernatant was  
493 filtered through a 0.22  $\mu$ m pore size sterile filter (Millipore, Billerica, MA), mixed with 0.5  
494 volume of Tissue culture total exosome isolation reagent (Invitrogen, catalog no. 4478359), and  
495 incubated for 16 h at 4°C. Thereafter, following centrifugation at 10,000  $\times g$  at 4°C for 60 min,  
496 the exosome pellet was re-suspended in 1 $\times$ PBS [54]. Exosomes were used in co-culture assay  
497 and also exosomal RNA and protein were extracted using the Total Exosome RNA and Protein  
498 Isolation kit (ThermoFisher) according to the manufacturer's protocols. About 10  $\mu$ g of the  
499 exosomal protein was separated on gradient (4-12%) SDS-PAGE gel and followed by transfer to  
500 nitrocellulose membrane (Bio-Rad). After blocking with 5% skim milk powder in Tris-buffered  
501 saline (TBS)-Tween for 60 min, the membrane was incubated with specific antibody against  
502 CD9 and CD81 (Abcam, catalog no. ab58989), followed (after washing) by anti-rabbit HRP-  
503 linked secondary antibody (DAKO Corporation catalog no. P0448) diluted 1 in 2,000. Signals  
504 from ECL substrate were detected by chemiluminescence (Amersham Bioscience, Uppsala,  
505 Sweden).

506 The identification of protein markers on the isolated exosomes was undertaken using the  
507 commercially available Exo-Check Exosome Ab Array kit (System Biosciences, Palo Alto, CA),  
508 as described by the manufacturer. The membrane was developed with SuperSignal West Femto  
509 Maximum Sensitivity Substrate (Thermo Fisher Scientific) and analyzed using a ChemiDoc  
510 imager (Bio-Rad) [55] [56]).

511 For immunofluorescence staining of exosomes, the H69 cells were cultured in glass slide  
512 chamber overnight before fixed at 4°C in ice-cold methanol for 10 min, washed 3 times in  
513 phosphate-buffered saline (PBS), and then permeabilized in 0.1% Triton X-100/PBS for 10 min  
514 at room temperature. Nonspecific binding was blocked with 0.5% Tween-20/PBS containing 1%  
515 bovine serum albumin (BSA) for 30 min. The primary antibodies against fluoroflore-488



516 labelled-CD81 was incubated for 60 min at room temperature. The incubated cells were washed  
517 in PBS. Before visualization by confocal microscope, we stained the cell nucleus with DAPI.  
518 The exosome particles were observed in H69 cytoplasm, ranging in size from ~ 40 to ~100 nm.

### 519 **Quantitative real time PCR**

520 Total RNA and exosomal RNA either from wtH69 or  $\Delta$ huPGRN-H69 cells were isolated using  
521 RNazol (Molecular Research Center, Inc.) or total exosome RNA isolation kit (ThermoFisher)  
522 following the manufacturer's instructions. One microgram of RNA was treated for DNase, then  
523 used for reverse transcription by an iScript cDNA synthesis kit (Thermo Fisher Scientific). Real  
524 time PCR was performed in ABI7300 Real time PCR machine using the SsoAdvanced Universal  
525 SYBR Green Supermix (Bio-Rad). The PCR reaction consisted of 5  $\mu$ l SsoAdvance SYBR  
526 Green PCR master mix, 0.5  $\mu$ l of 10  $\mu$ M forward and reverse primers, and 2  $\mu$ l of 5 times diluted  
527 template cDNA in a total volume of 10  $\mu$ l. The thermal cycle was initiation cycle at 95°C for 30  
528 sec followed by 40 cycles of annealing at 55°C for 1 min. Samples were analyzed in at least 3  
529 biological replicates (various cell passages) and in typical reactions. The human glyceraldehyde-  
530 3-phosphate dehydrogenase (GAPDH) transcript was run parallel with human granulin  
531 (huPGRN) and used for gene normalization. The differential granulin transcript fold change was  
532 calculated by formula  $2^{-\Delta\Delta Ct}$  [57]. The specific primers for huPGRN (Fig. 1B) and GAPDH are  
533 as follows: PGRN-F: 5'-atgataaccagacctgctgcc-3', PGRN-R: 5'-aaacacttggtaccctgcg-3',  
534 GAPDH-F; 5'-tgtagttgaggtcaatgaaggg-3' and GAPDH-F 5'-tgtagttgaggtcaatgaaggg-3'. The  
535 means and standard deviations of differential transcript expression were calculated by  
536 independent Student's *t*-tests using GraphPad Prism software (La Jolla, CA).

### 537 **Western blot**

538 The protein lysate or exosomal protein from of WT H69 and  $\Delta$ huPGRN-H69 cells were prepared  
539 using M-PER mammalian protein extraction reagent (ThermoFisher) or exosome protein  
540 isolation kit (ThermoFisher, catalog no. 4478545) following the manufacturer's protocols.  
541 Protein concentration of samples was determined using the Bradford assay [58]. Ten micrograms  
542 of cell lysate or 20  $\mu$ g of exosomal protein was separated on gradient SDS-polyacrylamide gel  
543 (4-12% Bis-Tris, Invitrogen) and transferred to nitrocellulose membrane (Trans-Blot  
544 Turbo, Bio-Rad). Each membrane was investigated by enhanced chemiluminescence (ECL)  
545 substrate (GE Healthcare) using first antibodies against huPGRN (Abcam, catalog no. ab  
546 108608) or human GAPDH (hGAPDH) (Sigma-Aldrich, catalog no. G9545) and HRP  
547 conjugated-secondary antibodies. The expression level of huPGRN protein from cell lysate or  
548 exosomes were imaged and analyzed using the FluroChem system (Bio-technie, Minneapolis,  
549 MN). Relative expression levels of huPGRN protein were investigated after GAPDH level  
550 normalization and differences compared using independent Student's *t*-tests.

### 551 **Cholangiocarcinoma (CCA) gene expression panel analysis**

552 To investigate the CCA gene expression profile from exosomes derived-rOv-GRN-1-treated  
553 H69, we used a predesigned Cholangiocarcinoma Pathway Panel (88 targets) (PrimePCR, Bio-  
554 Rad, Hercules, CA, catalog no. 100-2531). One microgram of total RNA from each exosome  
555 sample was converted to cDNA (Supermix iScript kit, Bio-Rad). A one in 10 dilution of cDNA  
556 was used for qPCR reaction mixture with final concentration of 1 $\times$  SsoAdvanced universal  
557 SYBR super mix (Bio-Rad) and 1 $\times$ PrimePCR assays for the designated target. Reactions were  
558 performed in three technical replicates at 10  $\mu$ l final volume, using the iQ5 real time PCR system



559 (Bio-Rad) starting with activation at 95°C for 2 min, followed by 40 cycles of denaturation at  
560 95°C, 5 s, and annealing/elongation at 60°C, 30 s. Specificity of target amplification was  
561 confirmed by melting-curve analysis. Controls for evaluating reverse transcription performance,  
562 RNA quality, genomic DNA contamination and PCR reaction performance were included from  
563 the array kit (Bio-Rad). The reference genes, TBP, GAPDH, and HPRT1 assay for relative gene  
564 expression analysis to normalize for variation in the amount of input mRNA between samples  
565 were included. The DNA template serve as a positive real-time PCR control for the  
566 corresponding gene assay. The differential fold change for the target genes was analyzed by  
567 PrimePCR Analysis Software (Bio-Rad).

### 568 **Uptake of exosomes by cholangiocytes**

569 To investigate whether rOv-GRN-1 treated-H69 use the exosomal route to communicate CCA-  
570 conducive mRNAs to adjacent naïve cells, exosomes were labeled with the PKH26 Fluorescent  
571 cell linker kit (Sigma-Aldrich), which enables monitoring of exosome uptake and other  
572 nanoparticles in other cells [59, 60]. In brief, isolated exosomes from culture media were re-  
573 suspended in one ml of diluent C (an aqueous solution designed to maintain cell viability with  
574 maximum dye solubility and staining efficiency)[61]. Subsequently, 4 µl of PKH26 was diluted  
575 in another 1 ml diluent C. The samples were mixed gently and incubated for 5 min (periodic  
576 mixing), after which 2 ml 1% bovine serum albumin (BSA) was added to bind the excess dye.  
577 The mixture containing PKH26-stained exosomes was subjected to precipitation using Tissue  
578 culture exosome isolation reagent (ThermoFisher), as above, after which the exosomes were  
579 suspended in H69 complete medium and co-cultured with H69 or ΔhuPGRN-H69 cells with at  
580 80-90% confluency in cell culture 4 wells of poly-lysine coated cover slide chamber (Lab-Tek  
581 II), the negative control group was co-cultured with exosomes without PKH26 staining. After  
582 cells incubation with PKH26-labeled exosomes for 90 min at 37°C in 5% CO<sub>2</sub>, cells were stained  
583 with NucBlue Live Cell Stain ReadyProbes (Invitrogen) following the protocol and visualized  
584 the staining by confocal fluorescence microscopy (Zeiss Cell Observer SD Spinning Disk  
585 Confocal Microscope, Carl Zeiss Microscopy, Thornwood, NY). A negative control of  
586 endocytosis inhibition was included, which involved addition of Pitstop 2, endocytosis clathrin  
587 inhibitor (Abcam, catalog no. ab120687) [62] at 30 µM to recipient cells for 15 min, before co-  
588 culture with labeled-exosomes.

### 589 **Functional CCA mRNA horizontally intercellular transfer via exosome**

590 To demonstrate that the CCA mRNAs carrying by exosome derived-rOv-GRN-1 treated-  
591 ΔhuPGRN-H69 cells were endocytosed and function inside the naïve H69 cells. We co-cultured  
592 the PKH-26 stained-exosomes with recipient cells; WT-H69 or ΔhuPGRN-H69 cells. Briefly,  
593 5×10<sup>4</sup> H69 or ΔhuPGRN-H69 cells were seeded into a poly-L-lysine coated wells of a 24-well  
594 plate and maintained overnight in H69 complete medium [63]. Thereafter, exosome particles  
595 (~6.25 µg) were added into each well, after which cells were collected at 3, 6 and 24 h. Cellular  
596 RNA was isolated as above, cDNA reverse transcribed using the iScript cDNA synthesis system  
597 (ThermoFisher), and levels of mRNA of target genes including MAPK13, SOX2, SOX11,  
598 ERBB2, PTPN13, and β-catenin established by RT-PCR, using SYBR Green labeling  
599 (SsoAdvance Master Mix, Bio-Rad). The specific primers are following: MAPK13 (forward: 5'-  
600 gagaagtgccatcaagaa-3' and reverse: 5'-gtctcattcacagccaggt-3') [64], SOX2 (forward: 5'-  
601 atgcacaactcggagatcag-3 and reverse 5'-tgagcgtcttggtttccg-3') [63], SOX11 (forward: 5'-  
602 gggccccagatggaaggttgaa-3' and reverse 5'-gcattgagtctgcttgccacca-3') [65], ERBB2 (forward:  
603 5'-cctctgacgtccatcatctc-3' and reverse: 5'-atctctgctgccctcgtt-3')[66], PTPN13 (forward: 5'-

604 caaagtgatcgcgtccta-3' and reverse: 5'-cgggacatgttcttagatgtt-3') [26], and  $\beta$ -catenin (forward:  
605 5'-aaaatggcagtcgcttag-3' and reverse: 5'-ttgaaggcagctctgcgta-3') [67]. The negative controls,  
606 non-exosome treated cells and exosome derived- $\Delta$ huPGRN-H69 cell (without rO $\nu$ -GRN-1) were  
607 included to confirm that the high expression of CCA mRNAs were not artifacts.

## 608 **Statistical analysis**

609 Statistical analysis was performed using GraphPad Prism 8 software (GraphPad Software Inc).  
610 One-way ANOVA was used for every comparison between knockout genotypes versus wild type  
611 including before and after rO $\nu$ -GRN-1 treatment. Multiple comparison measure ANOVA was  
612 used for cell growth curves comparison. Values of  $P < 0.05$  were considered to be statistically  
613 significant. Cell index (CI) assays were performed in triplicate. CI was automatically registered  
614 by the software RTCA, ACEA Biosciences Inc., San Diego, CA, USA. Means  $\pm$  SD are  
615 indicated, plotted using GraphPad Prism 8 (GraphPad Software, San Diego, CA).

## 616 **Acknowledgements**

617 We thank Drs. Griffin P. Rodgers, NIDDK, National Institutes of Health (NIH) and Yang Liu,  
618 Institute of Human Virology, School of Medicine, University of Maryland for support with  
619 exosome studies and Ion Torrent-based deep sequencing. PA was supported by the Ph.D.  
620 program at the Faculty of Medicine, Khon Kaen University and the Thailand Research Fund  
621 through the Royal Golden Jubilee Ph.D. Program, award number PHD/0111/2557 (PA, TL). We  
622 acknowledge support from award R01CA164719 (TL, AL, PJB) from the National Cancer  
623 Institute (NCI), NIH. The content is solely the responsibility of the authors and does not  
624 necessarily represent the official views of the Thailand Research Fund, the NCI or the NIH.

## 625 **Figure legends**

626 **Figure 1. Programmed CRISPR/Cas9 mutation of the human progranulin gene in a**  
627 **cholangiocyte cell line. Panel A.** Linear map of a pre-designed lentiviral construct containing  
628 codon-optimized Cas9 protein; gRNA targeting human granulin exon2 (red bar) and puromycin-  
629 resistant protein is expressed from a single vector. The human U6 promoter and T7 promoter  
630 were used for driven gRNA and fusion puromycin resistant (dark gray bar) and Cas9 (green bar)  
631 transcription, also the 5' and 3' long terminal repeats (LTR) of lentiviral vector derived from  
632 HIV-1 (light gray blocks). **Panel B.** Schematic of the partial human granulin gene precursor  
633 (GRN) on chromosome 17: NC\_000017.11 regions 44,345,086-44,353,106 (8,021bp) and  
634 protein structure. Nucleotide sequence in exon2 encoded N-terminal and partial of  
635 granulin/epithelin module (GEM) indicating locations of gRNA (4,417-4,438 nt; red colored-  
636 letter) predicted double-stranded break (DSB) (red arrow). **Panel C, D, and E.** INDEL mutations  
637 resulting from gene-edited targeting exon2 of GRN in H69 cell. The mutants H69 cells (gRNA,  
638 Cas9, and puromycin integrated-cells), were survived after puromycin treatment (up to 300  
639 ng/ml) and while the wild type H69 cells were completely dead. On-target gene repairs on exon2  
640 of GRN locus were sequenced by Ion Torrent System and analyzed by CRISPResso. Frequency  
641 distribution of **Panel C** position-dependent insertions (red bars) and **Panel D** deletion (magenta  
642 bars) sizes; these varied from point mutations to 5 bp adjacent to the DSB. **Panel E.** The  
643 examples of mutations; 2 and 6 bp deletions, 1 bp insertion and substitutions comparing with the  
644 reference sequence. Three biological repeats were undertaken, and the numbers of reads and  
645 efficiency of gene editing were: Biological 1, 140,384 reads, 12.32% indels; biological 2, 93,689  
646 reads, 10.94% indels; biological 3, 152,661 reads, 13.27% indels.  
647

648 **Figure 2. Characterization of exosomes shed from H69 cholangiocytes, the huPGRN**  
649 **mRNA and protein expression levels, and the proliferative effect of recombinant liver**  
650 **fluke granulin, rOv-GRN-1. Panels A and B.** Reduction of human GRN transcription levels  
651 from  $\Delta$ huPGRN-H69 cell RNA; red bars (~70%) comparing with WT H69 (black bars). The  
652 GRN differential transcript after normalization with human GAPDH gene; mean  $\pm$ SD, n = 3  
653 (biological replicates);  $p < 0.0001$  (\*\*\*\*) by unpaired *t*-test. Diminished level of hPGRN protein  
654 revealed by western blot analysis using anti-PGRN antibody compared with anti-GAPDH  
655 antibody. The reduction of PGRN in  $\Delta$ huPGRN-H69 cells (red bars) was ~80%. The GAPDH  
656 protein levels were stable. These decreased levels of PGRN protein were significantly different  
657 from WT H69 (black bars); n = 3 (biological replicates);  $p < 0.0001$  (\*\*\*\*) by unpaired  
658 Student's *t*-test. **Panel C.** The low percentage of relative cell growth index of  $\Delta$ huGRN-H69  
659 cells (blue line) compared with WT H69 cells (gray line). The growth index of  $\Delta$ huGRN-H69  
660 was normal after Ov-GRN treatment (100 nM) for 12 hours (red line) as Ov-GRN treated-WT  
661 H69 (black line). The  $\Delta$ huGRN-H69 continued to grow under Ov-GRN treatment for up to 100  
662 hours, while growth of wild type H69 had slowed at 24 hours and all the cells died by 100 hours.  
663

664 **Figure 3. Exosome derived H69 cell characterization and PGRN expression. Panels A, B.**  
665 Characterization of exosomes from H69 cells by western blot for the exosome-specific markers,  
666 CD9 and CD81. The vesicle composition was determined using an Exosome Antibody Array.  
667 Dark spots indicate presence of the marked protein. Absence of a spot for GM130 indicates  
668 absence of cellular contaminants (**panel C**). The visualization of exosome particles in H69 cell  
669 cytoplasm were revealed by confocal microscopy with anti-CD81 labelled with fluorophore 488  
670 (green) with a size distribution between 40-100 nm; DAPI-stained nuclei (blue). The exosomal  
671 RNA and cell lysate protein from  $\Delta$ huPGRN-H69 showed ~90% reduction (**panels D, E**, red  
672 lines) after normalization with huGAPDH and comparison with H69 (black). The levels of  
673 PGRN were significantly reduced; unpaired *t*-test,  $p < 0.0001$  (\*\*\*\*), n = 3.  
674

675 **Figure 4. The cholangiocarcinoma (CCA) related-gene array analysis. Panel A.** The CCA  
676 gene records of  $\Delta$ huGRN-H69 cells with and without exposure to recombinant Ov-GRN-1,  
677 compared with H69 exosomal RNA. The heat map was plotted using GraphPad Prism 8 for  
678 exosomal CCA mRNA expression profiles of the  $\Delta$ huGRN-H69, rOv-GRN +H69, rOv-GRN +  
679  $\Delta$ huGRN+H69 treatment groups of cells, with differential fold changes in transcription, from 0-  
680 15-fold. The '1' indicates baseline level expression, and '0' indicated the absence of expression.

681 **Figure 5. Confirmation of uptake of extracellular exosomes and paracrine transfer of**  
682 **mRNA from donor cells to the naïve recipient cells. Panel A.** Fifty-thousand naïve H69 or  
683  $\Delta$ huGRN-H69 cells were seeded into 4-well chambers, coated with poly-L-Lysine and incubated  
684 at 37 °C for overnight. Subsequently the medium was replaced, and the cells incubated cells for  
685 90 min, at which point nuclei were stained with NucBlu Live Cell Stain ReadyProbe reagent  
686 (blue). A negative control group, which was not co-cultured with the labeled exosomes, was  
687 included. Merged (right panel) left panel with bright field. Magnification, 40 $\times$ ; scale bar, 10  $\mu$ m.  
688 **Panel B.** Confirmation that exRNAs secreted from donor cells have been endocytosed and  
689 entered the target cells. The modifying of the gene expression microenvironment in naïve cell  
690 were confirmed by analysis of several informative target genes - SOX2, SOX11 and MAPK13 at  
691 various time points (0-24 hours). With the responses likely to have resulted from regulation by  
692 the exosomal RNA (exRNA).

693

694 **References**

- 695 1. Sirica AE, Gores GJ, Groopman JD, Selaru FM, Strazzabosco M, Wei Wang X, et al.  
696 Intrahepatic Cholangiocarcinoma: Continuing Challenges and Translational Advances.  
697 *Hepatology*. 2019;69(4):1803-15. Epub 2018/09/27. doi: 10.1002/hep.30289. PubMed PMID:  
698 30251463; PubMed Central PMCID: PMC6433548.
- 699 2. Khan AS, Dageforde LA. Cholangiocarcinoma. *Surg Clin North Am*. 2019;99(2):315-35.  
700 Epub 2019/03/09. doi: 10.1016/j.suc.2018.12.004. PubMed PMID: 30846037.
- 701 3. Shin HR, Oh JK, Masuyer E, Curado MP, Bouvard V, Fang YY, et al. Epidemiology of  
702 cholangiocarcinoma: an update focusing on risk factors. *Cancer Sci*. 2010;101(3):579-85. Epub  
703 2010/01/21. doi: 10.1111/j.1349-7006.2009.01458.x. PubMed PMID: 20085587.
- 704 4. Fedorova OS, Kovshirina YV, Kovshirina AE, Fedotova MM, Deev IA, Petrovskiy FI, et  
705 al. Opisthorchis felinus infection and cholangiocarcinoma in the Russian Federation: A review  
706 of medical statistics. *Parasitol Int*. 2017;66(4):365-71. Epub 2016/07/31. doi:  
707 10.1016/j.parint.2016.07.010. PubMed PMID: 27474689.
- 708 5. Sripta B, Kaewkes S, Sithithaworn P, Mairiang E, Laha T, Smout M, et al. Liver fluke  
709 induces cholangiocarcinoma. *PLoS Med*. 2007;4(7):e201. Epub 2007/07/12. doi:  
710 10.1371/journal.pmed.0040201. PubMed PMID: 17622191; PubMed Central PMCID:  
711 PMC61913093.
- 712 6. Humans IWGotEoCRt. Biological agents. Volume 100 B. A review of human  
713 carcinogens. *IARC Monogr Eval Carcinog Risks Hum*. 2012;100(Pt B):1-441. PubMed PMID:  
714 23189750.
- 715 7. Sithithaworn P, Yongvanit P, Duengai K, Kiatsopit N, Pairojkul C. Roles of liver fluke  
716 infection as risk factor for cholangiocarcinoma. *J Hepatobiliary Pancreat Sci*. 2014;21(5):301-8.  
717 Epub 2014/01/11. doi: 10.1002/jhbp.62. PubMed PMID: 24408775.
- 718 8. Khan SA, Tavolari S, Brandi G. Cholangiocarcinoma: Epidemiology and risk factors.  
719 *Liver Int*. 2019. Epub 2019/03/10. doi: 10.1111/liv.14095. PubMed PMID: 30851228.
- 720 9. Maizels RM, Smits HH, McSorley HJ. Modulation of Host Immunity by Helminths: The  
721 Expanding Repertoire of Parasite Effector Molecules. *Immunity*. 2018;49(5):801-18. Epub  
722 2018/11/22. doi: 10.1016/j.immuni.2018.10.016. PubMed PMID: 30462997; PubMed Central  
723 PMCID: PMC6269126.
- 724 10. Coakley G, Maizels RM, Buck AH. Exosomes and Other Extracellular Vesicles: The  
725 New Communicators in Parasite Infections. *Trends Parasitol*. 2015;31(10):477-89. Epub  
726 2015/10/05. doi: 10.1016/j.pt.2015.06.009. PubMed PMID: 26433251; PubMed Central PMCID:  
727 PMC64685040.
- 728 11. Mulvenna J, Sripta B, Brindley PJ, Gorman J, Jones MK, Colgrave ML, et al. The  
729 secreted and surface proteomes of the adult stage of the carcinogenic human liver fluke  
730 *Opisthorchis viverrini*. *Proteomics*. 2010;10(5):1063-78. Epub 2010/01/06. doi:  
731 10.1002/pmic.200900393. PubMed PMID: 20049860; PubMed Central PMCID:  
732 PMC63038172.
- 733 12. Sripta B. Pathobiology of opisthorchiasis: an update. *Acta Trop*. 2003;88(3):209-20. Epub  
734 2003/11/13. PubMed PMID: 14611875.
- 735 13. Chaiyadet S, Smout M, Laha T, Sripta B, Loukas A, Sotillo J. Proteomic characterization  
736 of the internalization of *Opisthorchis viverrini* excretory/secretory products in human cells.  
737 *Parasitol Int*. 2017;66(4):494-502. Epub 2016/02/14. doi: 10.1016/j.parint.2016.02.001. PubMed  
738 PMID: 26873540; PubMed Central PMCID: PMC65149449.



- 739 14. Chaiyadet S, Smout M, Johnson M, Whitchurch C, Turnbull L, Kaewkes S, et al.  
740 Excretory/secretory products of the carcinogenic liver fluke are endocytosed by human  
741 cholangiocytes and drive cell proliferation and IL6 production. *Int J Parasitol.* 2015b;45(12):773-  
742 81. doi: 10.1016/j.ijpara.2015.06.001. PubMed PMID: 26187786; PubMed Central PMCID:  
743 PMCPMC4912216.
- 744 15. Chaiyadet S, Sotillo J, Smout M, Cantacessi C, Jones MK, Johnson MS, et al.  
745 Carcinogenic Liver Fluke Secretes Extracellular Vesicles That Promote Cholangiocytes to Adopt  
746 a Tumorigenic Phenotype. *J Infect Dis.* 2015a;212(10):1636-45. doi: 10.1093/infdis/jiv291.  
747 PubMed PMID: 25985904; PubMed Central PMCID: PMCPMC4621255.
- 748 16. Smout MJ, Laha T, Mulvenna J, Sriya B, Suttiprapa S, Jones A, et al. A granulin-like  
749 growth factor secreted by the carcinogenic liver fluke, *Opisthorchis viverrini*, promotes  
750 proliferation of host cells. *PLoS Pathog.* 2009;5(10):e1000611. Epub 2009/10/10. doi:  
751 10.1371/journal.ppat.1000611. PubMed PMID: 19816559; PubMed Central PMCID:  
752 PMC2749447.
- 753 17. Bansal PS, Smout MJ, Wilson D, Cobos Caceres C, Dastpeyman M, Sotillo J, et al.  
754 Development of a Potent Wound Healing Agent Based on the Liver Fluke Granulin Structural  
755 Fold. *J Med Chem.* 2017;60(10):4258-66. Epub 2017/04/21. doi:  
756 10.1021/acs.jmedchem.7b00047. PubMed PMID: 28425707.
- 757 18. Dastpeyman M, Bansal PS, Wilson D, Sotillo J, Brindley PJ, Loukas A, et al. Structural  
758 Variants of a Liver Fluke Derived Granulin Peptide Potently Stimulate Wound Healing. *J Med*  
759 *Chem.* 2018;61(19):8746-53. Epub 2018/09/06. doi: 10.1021/acs.jmedchem.8b00898. PubMed  
760 PMID: 30183294.
- 761 19. Haugen B, Karinshak SE, Mann VH, Popratiloff A, Loukas A, Brindley PJ, et al.  
762 Granulin Secreted by the Food-Borne Liver Fluke *Opisthorchis viverrini* Promotes Angiogenesis  
763 in Human Endothelial Cells. *Front Med (Lausanne).* 2018;5:30. Epub 2018/03/06. doi:  
764 10.3389/fmed.2018.00030. PubMed PMID: 29503819; PubMed Central PMCID:  
765 PMCPMC5820972.
- 766 20. Smout MJ, Sotillo J, Laha T, Papatpremsiri A, Rinaldi G, Pimenta RN, et al.  
767 Carcinogenic Parasite Secretes Growth Factor That Accelerates Wound Healing and Potentially  
768 Promotes Neoplasia. *PLoS Pathog.* 2015;11(10):e1005209. Epub 2015/10/21. doi:  
769 10.1371/journal.ppat.1005209. PubMed PMID: 26485648; PubMed Central PMCID:  
770 PMC4618121.
- 771 21. Arunsan P, Ittiprasert W, Smout MJ, Cochran CJ, Mann VH, Chaiyadet S, et al.  
772 Programmed knockout mutation of liver fluke granulin attenuates virulence of infection-induced  
773 hepatobiliary morbidity. *Elife.* 2019;8. doi: 10.7554/eLife.41463. PubMed PMID: 30644359;  
774 PubMed Central PMCID: PMCPMC6355195.
- 775 22. Vara JA, Portela A, Ortin J, Jimenez A. Expression in mammalian cells of a gene from  
776 *Streptomyces alboniger* conferring puromycin resistance. *Nucleic acids research.*  
777 1986;14(11):4617-24. Epub 1986/06/11. doi: 10.1093/nar/14.11.4617. PubMed PMID: 3714487;  
778 PubMed Central PMCID: PMCPMC311469.
- 779 23. Pinello L, Canver MC, Hoban MD, Orkin SH, Kohn DB, Bauer DE, et al. Analyzing  
780 CRISPR genome-editing experiments with CRISPResso. *Nat Biotechnol.* 2016;34(7):695-7.  
781 Epub 2016/07/13. doi: 10.1038/nbt.3583. PubMed PMID: 27404874; PubMed Central PMCID:  
782 PMCPMC5242601.



- 783 24. Shen MW, Arbab M, Hsu JY, Worstell D, Culbertson SJ, Krabbe O, et al. Predictable and  
784 precise template-free CRISPR editing of pathogenic variants. *Nature*. 2018;563(7733):646-51.  
785 Epub 2018/11/09. doi: 10.1038/s41586-018-0686-x. PubMed PMID: 30405244.
- 786 25. Ke N, Wang X, Xu X, Abassi YA. The xCELLigence system for real-time and label-free  
787 monitoring of cell viability. *Methods Mol Biol*. 2011;740:33-43. Epub 2011/04/07. doi:  
788 10.1007/978-1-61779-108-6\_6. PubMed PMID: 21468966.
- 789 26. Revillion F, Puech C, Rabenoelina F, Chalbos D, Peyrat JP, Freiss G. Expression of the  
790 putative tumor suppressor gene PTPN13/PTPL1 is an independent prognostic marker for overall  
791 survival in breast cancer. *Int J Cancer*. 2009;124(3):638-43. Epub 2008/11/13. doi:  
792 10.1002/ijc.23989. PubMed PMID: 19004008; PubMed Central PMCID: PMCPMC2740876.
- 793 27. Jusakul A, Cutcutache I, Yong CH, Lim JQ, Huang MN, Padmanabhan N, et al. Whole-  
794 Genome and Epigenomic Landscapes of Etiologically Distinct Subtypes of Cholangiocarcinoma.  
795 *Cancer Discov*. 2017;7(10):1116-35. Epub 2017/07/02. doi: 10.1158/2159-8290.CD-17-0368.  
796 PubMed PMID: 28667006; PubMed Central PMCID: PMCPMC5628134.
- 797 28. Hu L, Wang J, Zhou X, Xiong Z, Zhao J, Yu R, et al. Exosomes derived from human  
798 adipose mesenchymal stem cells accelerates cutaneous wound healing via optimizing the  
799 characteristics of fibroblasts. *Sci Rep*. 2016;6:32993. doi: 10.1038/srep32993. PubMed PMID:  
800 27615560; PubMed Central PMCID: PMCPMC5018733.
- 801 29. Bateman A, Cheung ST, Bennett HPJ. A Brief Overview of Progranulin in Health and  
802 Disease. *Methods Mol Biol*. 2018;1806:3-15. Epub 2018/06/30. doi: 10.1007/978-1-4939-8559-  
803 3\_1. PubMed PMID: 29956265.
- 804 30. Yokoyama T, Komori A, Nakamura M, Takii Y, Kamihira T, Shimoda S, et al. Human  
805 intrahepatic biliary epithelial cells function in innate immunity by producing IL-6 and IL-8 via  
806 the TLR4-NF-kappaB and -MAPK signaling pathways. *Liver Int*. 2006;26(4):467-76. doi:  
807 10.1111/j.1478-3231.2006.01254.x. PubMed PMID: 16629651.
- 808 31. Upontain S, Sereerak P, Laha T, Sripan B, Tangkawatana P, Brindley PJ, et al. Granulin  
809 Expression in Hamsters during *Opisthorchis viverrini* Infection-Induced  
810 Cholangiocarcinogenesis. *Asian Pac J Cancer Prev*. 2018;19(9):2437-45. doi:  
811 10.22034/APJCP.2018.19.9.2437. PubMed PMID: 30255697; PubMed Central PMCID:  
812 PMCPMC6249462.
- 813 32. Kiguchi K, Carbajal S, Chan K, Beltran L, Ruffino L, Shen J, et al. Constitutive  
814 expression of ErbB-2 in gallbladder epithelium results in development of adenocarcinoma.  
815 *Cancer Res*. 2001;61(19):6971-6. PubMed PMID: 11585718.
- 816 33. Andersen JB. Molecular pathogenesis of intrahepatic cholangiocarcinoma. *J*  
817 *Hepatobiliary Pancreat Sci*. 2015;22(2):101-13. doi: 10.1002/jhbp.155. PubMed PMID:  
818 25174625.
- 819 34. Churi CR, Shroff R, Wang Y, Rashid A, Kang HC, Weatherly J, et al. Mutation profiling  
820 in cholangiocarcinoma: prognostic and therapeutic implications. *PLoS One*.  
821 2014;9(12):e115383. doi: 10.1371/journal.pone.0115383. PubMed PMID: 25536104; PubMed  
822 Central PMCID: PMCPMC4275227.
- 823 35. Ross JS, Wang K, Gay L, Al-Rohil R, Rand JV, Jones DM, et al. New routes to targeted  
824 therapy of intrahepatic cholangiocarcinomas revealed by next-generation sequencing.  
825 *Oncologist*. 2014;19(3):235-42. doi: 10.1634/theoncologist.2013-0352. PubMed PMID:  
826 24563076; PubMed Central PMCID: PMCPMC3958461.
- 827 36. Loilome W, Bungkanjana P, Techasen A, Namwat N, Yongvanit P, Puapairoj A, et al.  
828 Activated macrophages promote Wnt/beta-catenin signaling in cholangiocarcinoma cells.

- 829 Tumour Biol. 2014;35(6):5357-67. doi: 10.1007/s13277-014-1698-2. PubMed PMID: 24549785;  
830 PubMed Central PMCID: PMC4862210.
- 831 37. Dokduang H, Juntana S, Techasen A, Namwat N, Yongvanit P, Khuntikeo N, et al.  
832 Survey of activated kinase proteins reveals potential targets for cholangiocarcinoma treatment.  
833 Tumour Biol. 2013;34(6):3519-28. doi: 10.1007/s13277-013-0930-9. PubMed PMID: 23812726.
- 834 38. Loilome W, Juntana S, Namwat N, Bhudhisawasdi V, Puapairoj A, Sripan B, et al.  
835 PRKAR1A is overexpressed and represents a possible therapeutic target in human  
836 cholangiocarcinoma. Int J Cancer. 2011;129(1):34-44. doi: 10.1002/ijc.25646. PubMed PMID:  
837 20824711.
- 838 39. Yothaisong S, Thanee M, Namwat N, Yongvanit P, Boonmars T, Puapairoj A, et al.  
839 *Opisthorchis viverrini* infection activates the PI3K/ AKT/PTEN and Wnt/beta-catenin signaling  
840 pathways in a Cholangiocarcinogenesis model. Asian Pac J Cancer Prev. 2014;15(23):10463-8.  
841 PubMed PMID: 25556493.
- 842 40. Chen BH, Gilbert LA, Cimini BA, Schnitzbauer J, Zhang W, Li GW, et al. Dynamic  
843 Imaging of Genomic Loci in Living Human Cells by an Optimized CRISPR/Cas System. Cell.  
844 2013;155(7):1479-91. doi: 10.1016/j.cell.2013.12.001. PubMed PMID: ISI:000328693300006.
- 845 41. Zhang QY, Men CJ, Ding XW. Upregulation of microRNA-140-3p inhibits epithelial-  
846 mesenchymal transition, invasion, and metastasis of hepatocellular carcinoma through  
847 inactivation of the MAPK signaling pathway by targeting GRN. J Cell Biochem. 2019. doi:  
848 10.1002/jcb.28750. PubMed PMID: 31044454.
- 849 42. Engel NW, Neumann JE, Ahlfeld J, Wefers AK, Merk DJ, Ohli J, et al. Canonical Wnt  
850 Signaling Drives Tumor-Like Lesions from Sox2-Positive Precursors of the Murine Olfactory  
851 Epithelium. PLoS One. 2016;11(11):e0166690. doi: 10.1371/journal.pone.0166690. PubMed  
852 PMID: 27902722; PubMed Central PMCID: PMC45130221.
- 853 43. Schnerch A, Cerdan C, Bhatia M. Distinguishing between mouse and human pluripotent  
854 stem cell regulation: the best laid plans of mice and men. Stem Cells. 2010;28(3):419-30. doi:  
855 10.1002/stem.298. PubMed PMID: 20054863.
- 856 44. Sui L, Bouwens L, Mfopou JK. Signaling pathways during maintenance and definitive  
857 endoderm differentiation of embryonic stem cells. Int J Dev Biol. 2013;57(1):1-12. doi:  
858 10.1387/ijdb.120115ls. PubMed PMID: 23585347.
- 859 45. Brennan DJ, Ek S, Doyle E, Drew T, Foley M, Flannelly G, et al. The transcription factor  
860 Sox11 is a prognostic factor for improved recurrence-free survival in epithelial ovarian cancer.  
861 Eur J Cancer. 2009;45(8):1510-7. doi: 10.1016/j.ejca.2009.01.028. PubMed PMID: 19272768.
- 862 46. Kuci V, Nordstrom L, Conrotto P, Ek S. SOX11 and HIG-2 are cross-regulated and affect  
863 growth in mantle cell lymphoma. Leuk Lymphoma. 2016;57(8):1883-92. doi:  
864 10.3109/10428194.2015.1121257. PubMed PMID: 26757780.
- 865 47. Kuci V, Nordstrom L, Jerkeman M, Ek S. Emerging role of SOX11 in mantle cell  
866 lymphoma. Blood and Lymphatic Cancer: Targets and Therapy. 2015;2015(5): 35-42.
- 867 48. Ninlawan K, O'Hara SP, Splinter PL, Yongvanit P, Kaewkes S, Surapaitoon A, et al.  
868 *Opisthorchis viverrini* excretory/secretory products induce toll-like receptor 4 upregulation and  
869 production of interleukin 6 and 8 in cholangiocyte. Parasitol Int. 2010;59(4):616-21. Epub  
870 2010/10/05. doi: 10.1016/j.parint.2010.09.008. PubMed PMID: 20887801; PubMed Central  
871 PMCID: PMC3319364.
- 872 49. Grubman SA, Perrone RD, Lee DW, Murray SL, Rogers LC, Wolkoff LI, et al.  
873 Regulation of intracellular pH by immortalized human intrahepatic biliary epithelial cell lines.

- 874 Am J Physiol. 1994;266(6 Pt 1):G1060-70. Epub 1994/06/01. doi:  
875 10.1152/ajpgi.1994.266.6.G1060. PubMed PMID: 8023938.
- 876 50. Ittiprasert W, Mann VH, Karinshak SE, Coghlan A, Rinaldi G, Sankaranarayanan G, et  
877 al. Programmed genome editing of the omega-1 ribonuclease of the blood fluke, *Schistosoma*  
878 *mansoni*. *Elife*. 2019;8. Epub 2019/01/16. doi: 10.7554/eLife.41337. PubMed PMID: 30644357;  
879 PubMed Central PMCID: PMC6355194.
- 880 51. Telenti A, Pierce LC, Biggs WH, di Iulio J, Wong EH, Fabani MM, et al. Deep  
881 sequencing of 10,000 human genomes. *Proc Natl Acad Sci U S A*. 2016;113(42):11901-6. doi:  
882 10.1073/pnas.1613365113. PubMed PMID: 27702888; PubMed Central PMCID:  
883 PMC6355194.
- 884 52. Canver MC, Haeussler M, Bauer DE, Orkin SH, Sanjana NE, Shalem O, et al. Integrated  
885 design, execution, and analysis of arrayed and pooled CRISPR genome-editing experiments. *Nat*  
886 *Protoc*. 2018;13(5):946-86. Epub 2018/04/14. doi: 10.1038/nprot.2018.005. PubMed PMID:  
887 29651054; PubMed Central PMCID: PMC6182299.
- 888 53. Anthis NJ, Clore GM. Sequence-specific determination of protein and peptide  
889 concentrations by absorbance at 205 nm. *Protein Sci*. 2013;22(6):851-8. Epub 2013/03/26. doi:  
890 10.1002/pro.2253. PubMed PMID: 23526461; PubMed Central PMCID: PMC3690723.
- 891 54. Santos JC, Lima NDS, Sarian LO, Matheu A, Ribeiro ML, Derchain SFM. Exosome-  
892 mediated breast cancer chemoresistance via miR-155 transfer. *Sci Rep*. 2018;8(1):829. Epub  
893 2018/01/18. doi: 10.1038/s41598-018-19339-5. PubMed PMID: 29339789; PubMed Central  
894 PMCID: PMC5770414.
- 895 55. Shenoy GN, Loyall J, Berenson CS, Kelleher RJ, Jr., Iyer V, Balu-Iyer SV, et al. Sialic  
896 Acid-Dependent Inhibition of T Cells by Exosomal Ganglioside GD3 in Ovarian Tumor  
897 Microenvironments. *J Immunol*. 2018;201(12):3750-8. Epub 2018/11/18. doi:  
898 10.4049/jimmunol.1801041. PubMed PMID: 30446565; PubMed Central PMCID:  
899 PMC6289713.
- 900 56. Betker JL, Angle BM, Graner MW, Anchordoquy TJ. The Potential of Exosomes From  
901 Cow Milk for Oral Delivery. *J Pharm Sci*. 2019;108(4):1496-505. Epub 2018/11/24. doi:  
902 10.1016/j.xphs.2018.11.022. PubMed PMID: 30468828.
- 903 57. Livak KJ, Schmittgen TD. Analysis of relative gene expression data using real-time  
904 quantitative PCR and the 2(-Delta Delta C(T)) Method. *Methods*. 2001;25(4):402-8. Epub  
905 2002/02/16. doi: 10.1006/meth.2001.1262. PubMed PMID: 11846609.
- 906 58. Bradford MM. A rapid and sensitive method for the quantitation of microgram quantities  
907 of protein utilizing the principle of protein-dye binding. *Anal Biochem*. 1976;72:248-54. Epub  
908 1976/05/07. PubMed PMID: 942051.
- 909 59. Garnier D, Magnus N, Lee TH, Bentley V, Meehan B, Milsom C, et al. Cancer cells  
910 induced to express mesenchymal phenotype release exosome-like extracellular vesicles carrying  
911 tissue factor. *J Biol Chem*. 2012;287(52):43565-72. Epub 2012/11/03. doi:  
912 10.1074/jbc.M112.401760. PubMed PMID: 23118232; PubMed Central PMCID:  
913 PMC3527943.
- 914 60. Puzar Dominkus P, Stenovc M, Sitar S, Lasic E, Zorec R, Plemenitas A, et al. PKH26  
915 labeling of extracellular vesicles: Characterization and cellular internalization of contaminating  
916 PKH26 nanoparticles. *Biochim Biophys Acta Biomembr*. 2018;1860(6):1350-61. Epub  
917 2018/03/20. doi: 10.1016/j.bbmem.2018.03.013. PubMed PMID: 29551275.
- 918 61. Tario JD, Jr., Humphrey K, Bantly AD, Muirhead KA, Moore JS, Wallace PK.  
919 Optimized staining and proliferation modeling methods for cell division monitoring using cell

- 920 tracking dyes. *J Vis Exp.* 2012;(70):e4287. Epub 2012/12/29. doi: 10.3791/4287. PubMed  
921 PMID: 23271219; PubMed Central PMCID: PMC3673170.
- 922 62. von Kleist L, Stahlschmidt W, Bulut H, Gromova K, Puchkov D, Robertson MJ, et al.  
923 Role of the clathrin terminal domain in regulating coated pit dynamics revealed by small  
924 molecule inhibition. *Cell.* 2011;146(3):471-84. Epub 2011/08/06. doi:  
925 10.1016/j.cell.2011.06.025. PubMed PMID: 21816279.
- 926 63. Heallen T, Zhang M, Wang J, Bonilla-Claudio M, Klysik E, Johnson RL, et al. Hippo  
927 pathway inhibits Wnt signaling to restrain cardiomyocyte proliferation and heart size. *Science.*  
928 2011;332(6028):458-61. Epub 2011/04/23. doi: 10.1126/science.1199010. PubMed PMID:  
929 21512031; PubMed Central PMCID: PMC3133743.
- 930 64. Yasuda K, Hirohashi Y, Kuroda T, Takaya A, Kubo T, Kanaseki T, et al. MAPK13 is  
931 preferentially expressed in gynecological cancer stem cells and has a role in the tumor-initiation.  
932 *Biochem Biophys Res Commun.* 2016;472(4):643-7. Epub 2016/03/13. doi:  
933 10.1016/j.bbrc.2016.03.004. PubMed PMID: 26969274.
- 934 65. Weigle B, Ebner R, Temme A, Schwind S, Schmitz M, Kiessling A, et al. Highly specific  
935 overexpression of the transcription factor SOX11 in human malignant gliomas. *Oncol Rep.*  
936 2005;13(1):139-44. Epub 2004/12/08. PubMed PMID: 15583815.
- 937 66. Rasti M, Honardar Z, Nikseresht M, Owji A. Quantitative Analysis of ErbB1 and ErbB2  
938 Genes Amplification by a High Performance Liquid Chromatography. *Avicenna J Med*  
939 *Biotechnol.* 2014;6(4):228-37. Epub 2014/11/22. PubMed PMID: 25414785; PubMed Central  
940 PMCID: PMC34224662.
- 941 67. Gilbert-Sirieix M, Makoukji J, Kimura S, Talbot M, Caillou B, Massaad C, et al.  
942 Wnt/beta-catenin signaling pathway is a direct enhancer of thyroid transcription factor-1 in  
943 human papillary thyroid carcinoma cells. *PLoS One.* 2011;6(7):e22280. Epub 2011/08/05. doi:  
944 10.1371/journal.pone.0022280. PubMed PMID: 21814573; PubMed Central PMCID:  
945 PMC3141030.
- 946

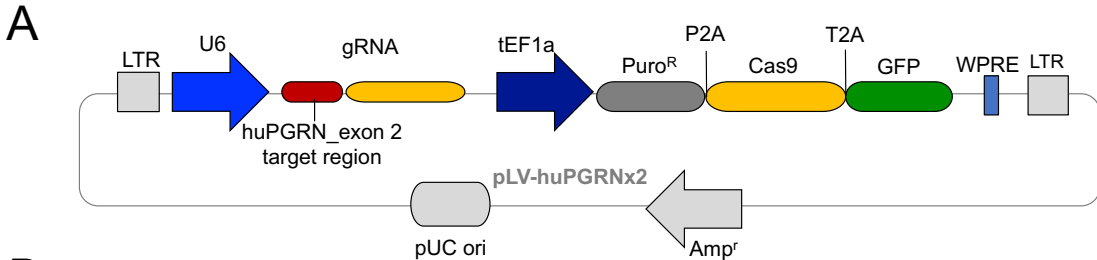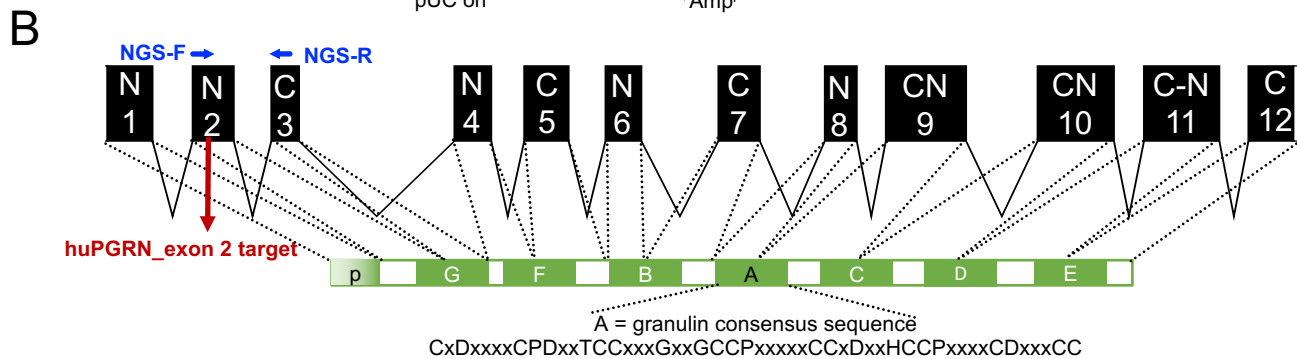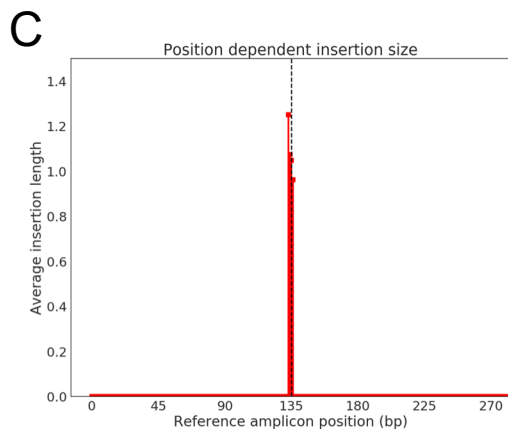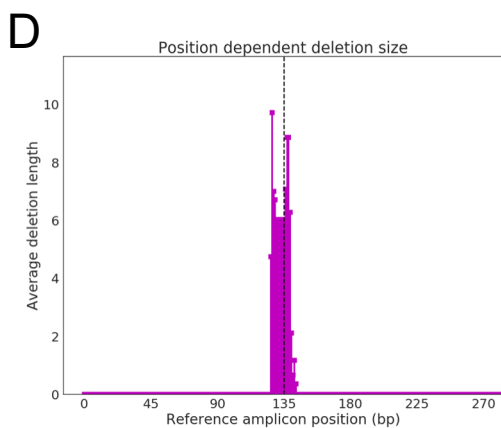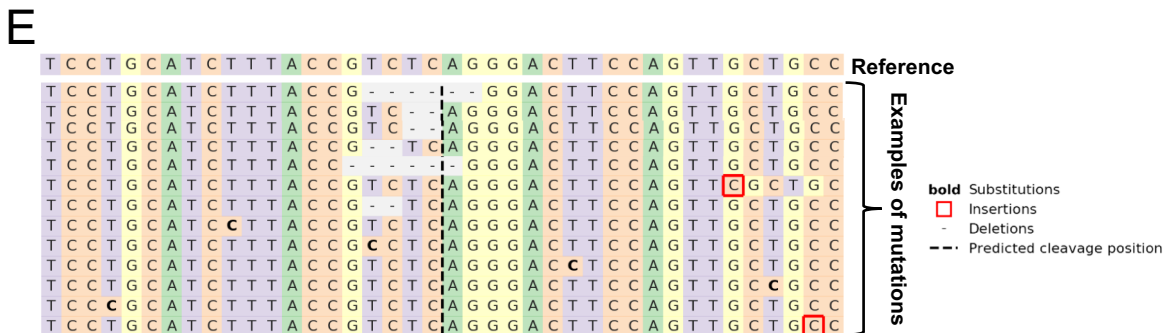



**A**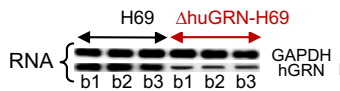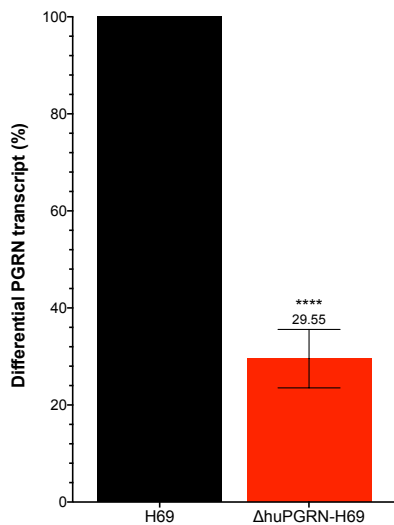**B**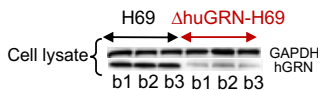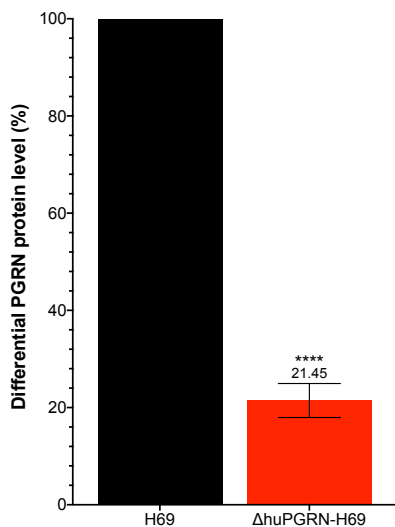**C**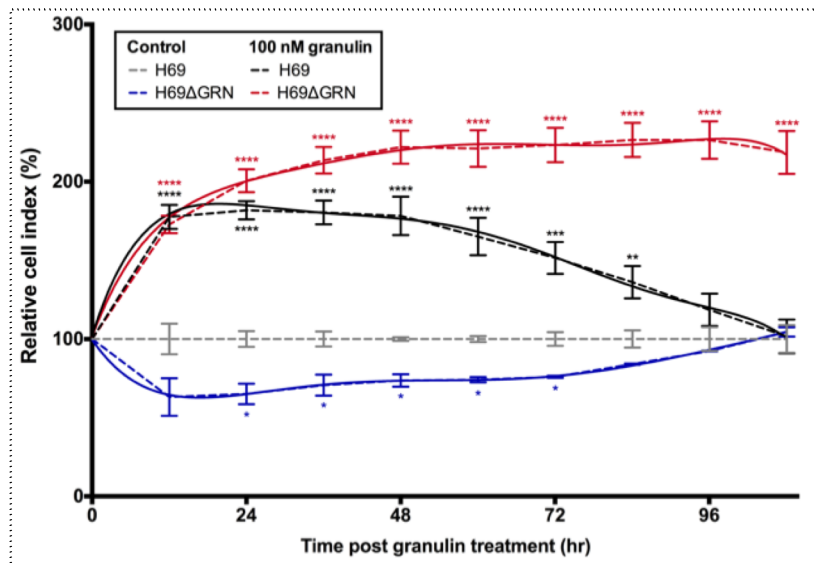

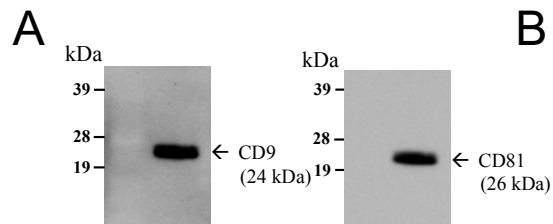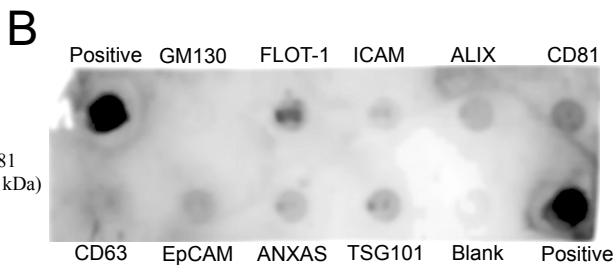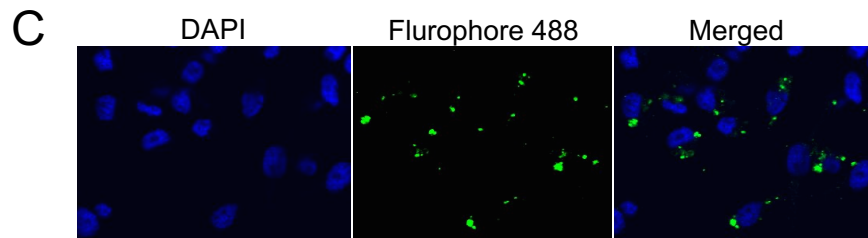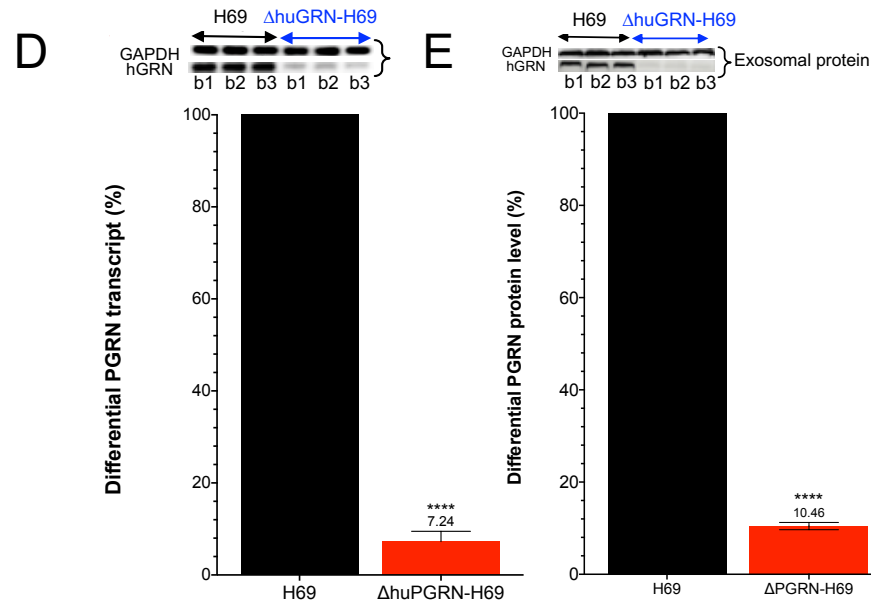

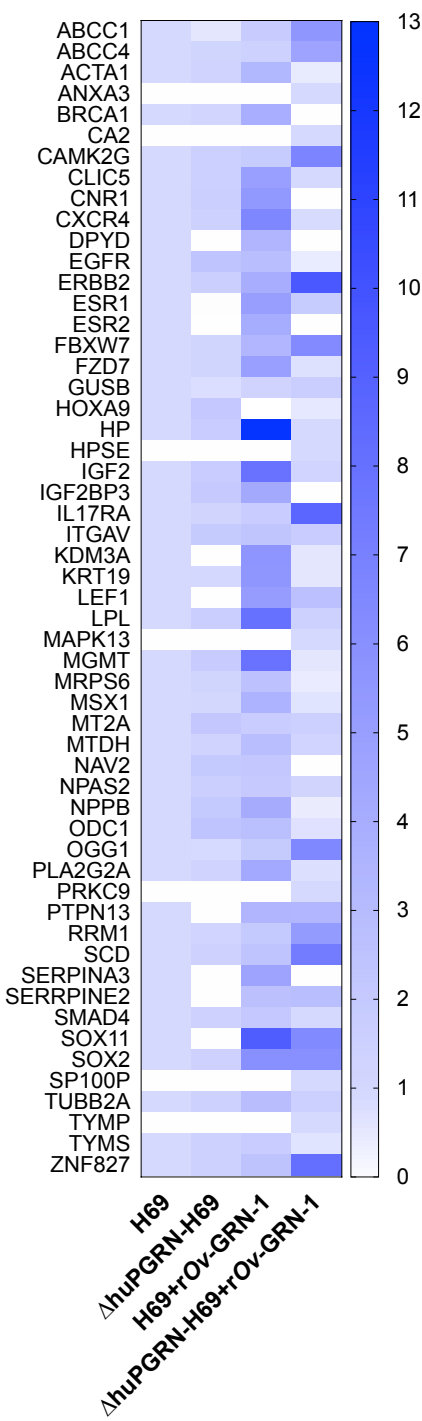

Non labeled-exosomes

Exosome internalization

Endocytosis inhibition

DAPI/PKH26

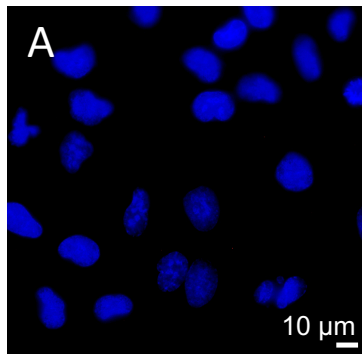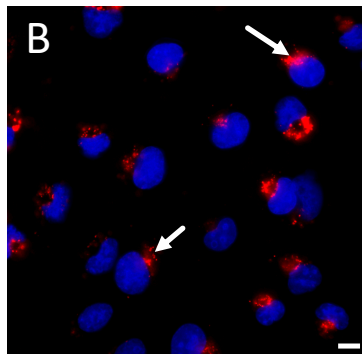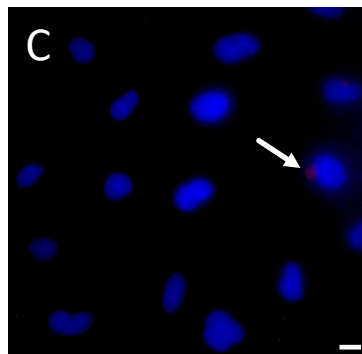

Merge with bright field

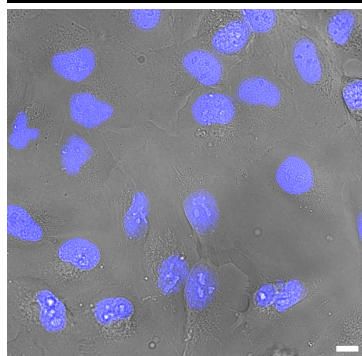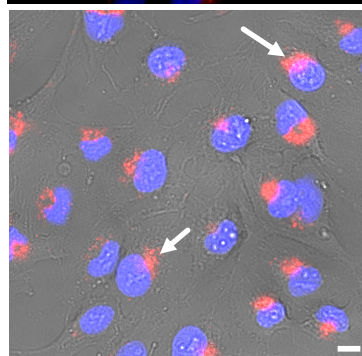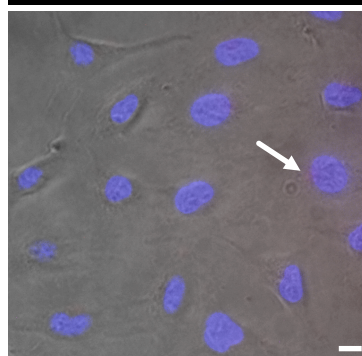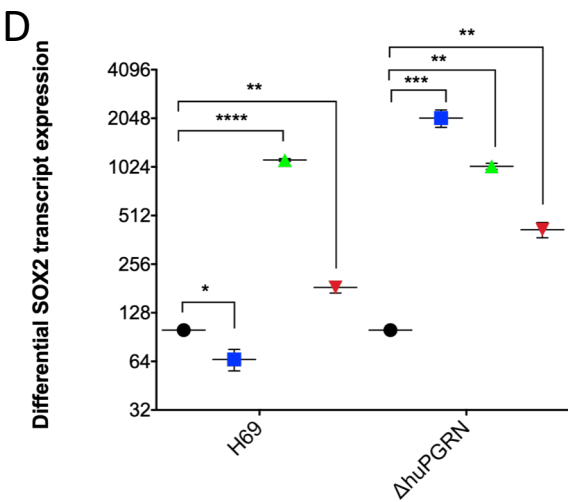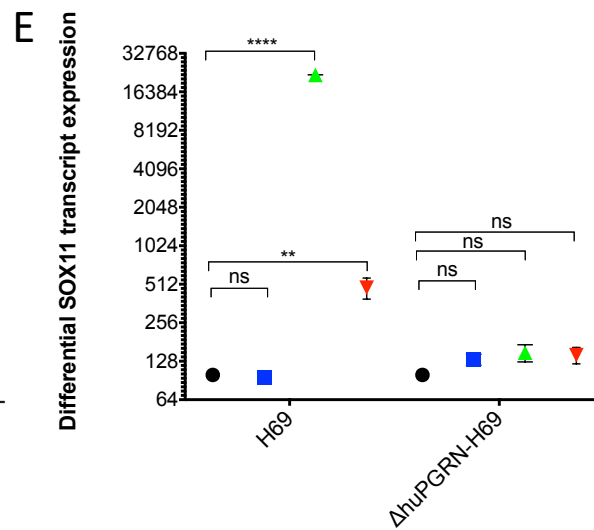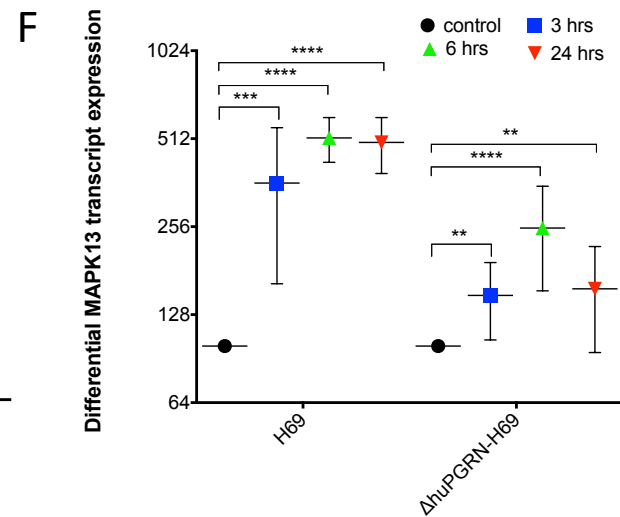

Source: https://www.biorxiv.org/content/10.1101/700427v1.full.pdf
